1 **Arabidopsis Apoplastic Fluid Contains sRNA- and Circular RNA-Protein**  
2 **Complexes that Are Located Outside Extracellular Vesicles**

3

4 **Hana Zand Karimi,<sup>a</sup> Patricia Baldrich,<sup>b</sup> Brian D. Rutter,<sup>a</sup> Lucía Borniego,<sup>a</sup> Kamil K.**  
5 **Zajt,<sup>a</sup> Blake C. Meyers,<sup>b,c</sup> and Roger W. Innes<sup>a,1</sup>**

6

7 <sup>a</sup>Department of Biology, Indiana University, Bloomington, Indiana 47405

8 <sup>b</sup>Donald Danforth Plant Science Center, St. Louis, Missouri 63132

9 <sup>c</sup>University of Missouri-Columbia, Division of Plant Sciences, Columbia, Missouri 65211

10

11 ORCID IDs: 0000-0003-4012-713X (H.Z.); 0000-0003-4669-6632 (P.B.); 0000-0002-  
12 4354-9832 (B.D.R.); 0000-0002-7884-4057 (L.B.); 0000-0001-6280-3464 (K.K.Z.); 0000-  
13 0003-3436-6097 (B.C.M.); 0000-0001-9634-1413 (R.W.I.)

14

15

16 **Short title:** Apoplastic RNA-Protein Complexes

17

18 **One-sentence summary:** The apoplast of Arabidopsis leaves contains diverse small and  
19 long-noncoding RNAs, including circular RNAs, that are bound to protein complexes and  
20 are located outside extracellular vesicles.

21

22 <sup>1</sup>Address correspondence to [rinnes@indiana.edu](mailto:rinnes@indiana.edu)

23

24 The author responsible for distribution of materials integral to the  
25 findings presented in this article in accordance with the policy described  
26 in the Instructions for Authors ([www.plantcell.org](http://www.plantcell.org)) is: Roger W. Innes  
27 ([rinnes@indiana.edu](mailto:rinnes@indiana.edu))

28

29 **ABSTRACT**

30

31 Previously, we have shown that apoplastic wash fluid purified from Arabidopsis leaves  
32 contains small RNAs (sRNAs). To investigate whether these sRNAs are encapsulated  
33 inside extracellular vesicles (EVs), we treated EVs isolated from Arabidopsis leaves with  
34 the protease trypsin and RNase A, which should degrade RNAs located outside EVs but  
35 not those located inside. These analyses revealed that apoplastic RNAs are mostly  
36 located outside EVs and are associated with proteins. Further analyses of these  
37 extracellular RNAs (exRNAs) revealed that they comprise both sRNAs and long non-  
38 coding RNAs (lncRNAs), including circular RNAs (circRNAs). We also found that exRNAs  
39 are highly enriched in the post-transcriptional modification N<sup>6</sup>-methyladenine (m<sup>6</sup>A).  
40 Consistent with this, we identified a putative m<sup>6</sup>A-binding protein in apoplastic wash fluid,  
41 GLYCINE-RICH RNA-BINDING PROTEIN 7 (GRP7), as well as the small RNA-binding  
42 protein ARGONAUTE2 (AGO2). These two proteins co-immunoprecipitated with each  
43 other, and with lncRNAs, including circRNAs. Mutation of *GRP7* or *AGO2* caused  
44 changes in both the sRNA and lncRNA content of apoplastic wash fluid, suggesting that  
45 these proteins contribute to the secretion and/or stabilization of exRNAs. We propose  
46 that these extravesicular RNAs mediate host-induced gene silencing, rather than RNA  
47 inside EVs.

48

49

## 50 INTRODUCTION

51  
52 The apoplast is the extracellular space outside the plasma membrane of plant cells  
53 that comprises the cell wall, xylem, and space between cells (Steudle, 1980; Guerra-  
54 Guimarães et al., 2016). Apoplastic fluid contains water, sugars, amino acids, cell wall  
55 modifying enzymes, growth regulators, and diverse stress-related proteins (Guerra-  
56 Guimarães et al., 2016; Huber and O'Day, 2017; Narula et al., 2020; Wang and Dean,  
57 2020; Wang et al., 2020). Recently, we and others have shown that apoplastic fluid also  
58 contains extracellular vesicles (EVs) that carry defense related proteins and small RNAs  
59 (sRNAs) (Rutter and Innes, 2017; Cai et al., 2018a; Baldrich et al., 2019; He et al., 2021).  
60 The role of EVs in plant-microbe interactions is thus an active area of investigation.

61 It has been shown that sRNAs from both plants and pathogens can hijack microbe  
62 or host RNA interference pathways to induce trans-kingdom gene silencing (Weiberg et  
63 al., 2013; Niu et al., 2015; Wang et al., 2017; Hou et al., 2019; Huang et al., 2019;  
64 Schaefer et al., 2020). Expression of sRNAs in plants that target pathogen genes has  
65 been used to confer resistance to diverse fungal, nematode and insect species (Nowara  
66 et al., 2010; Koch et al., 2013; Mamta et al., 2016; Qi et al., 2019). However, it is not clear  
67 how sRNAs are transferred between plant and pathogen cells. To avoid degradation, it is  
68 speculated that extracellular RNAs (exRNAs) need to be either tightly associated with  
69 RNA-binding proteins or encapsulated within EVs (Rutter and Innes, 2017; Koch and  
70 Wassenegger, 2021), but whether EVs and/or RNA-binding proteins are required for RNA  
71 secretion or movement within the apoplast is still under investigation.

72 Previously, we have reported that apoplastic wash fluid contains diverse species  
73 of small RNAs, including microRNAs (miRNAs), small interfering RNAs (siRNAs), and a  
74 previously overlooked class of tiny RNAs (tyRNAs; 10 to 17 nt) with unknown functions  
75 (Baldrich et al., 2019). In that study, we showed that apoplastic tyRNAs co-purified with  
76 EVs when using a density gradient. Notably, siRNAs and miRNAs were largely missing  
77 from density gradient-purified EVs, although they were present in total apoplastic wash  
78 fluid. These observations suggested that EVs may not be the primary carrier of apoplastic  
79 siRNAs and miRNAs (Baldrich et al., 2019). In support of this hypothesis, analysis of  
80 apoplastic siRNAs derived from transgenic expression of a hairpin RNA in *Arabidopsis*  
81 revealed that >70% of these were located outside EVs (Schlemmer et al., 2021).

82           Although density gradient centrifugation is a preferred method for obtaining highly  
83 pure EV preparations (Rutter and Innes, 2020), it is still possible for large RNA-protein  
84 complexes to co-purify with EVs, or RNAs to adhere to the surface of EVs, thus most  
85 work published to date, including our own, has not established whether plant EV-  
86 associated RNA is located inside or outside EVs. To eliminate extravesicular RNA-protein  
87 complexes and RNA attached to the surface of EVs, it is necessary to treat purified EVs  
88 first with proteases to remove any RNA-binding proteins and then with RNase to degrade  
89 the released RNAs (Rutter and Innes, 2020).

90           Recently, He et al. (2021) identified several RNA-binding proteins in the apoplast  
91 of Arabidopsis leaves that might be responsible for loading sRNAs into EVs, including  
92 ARGONAUTE1 (AGO1), ANNEXIN1 and 2 (ANN1 and ANN2), and RNA HELICASE11  
93 and 37 (RH11 and RH37). Protease protection assays indicated that these proteins are  
94 all located inside EVs. However, this work did not include a protease plus RNase  
95 treatment, thus did not distinguish between sRNAs located outside EVs in RNA-protein  
96 complexes versus sRNAs located inside EVs (He et al., 2021). Similarly, Cai et al. (2018),  
97 used micrococcal nuclease treatment to show that sRNAs that had co-pelleted with EVs  
98 were protected from degradation. However, the lack of prior protease treatment likely left  
99 RNA-protein complexes intact, thus this analysis also did not distinguish between sRNAs  
100 located in RNA-protein complexes versus those located inside EVs.

101           Although plant EVs have only been reported to contain sRNAs and tyRNAs,  
102 mammalian EVs have been reported to carry sRNAs as well as lncRNAs, including  
103 circular RNAs (circRNAs) (Xu et al., 2020b). circRNAs are covalently closed, single-  
104 stranded circles derived from back-splicing reactions of RNA Polymerase II transcripts,  
105 whereby a splice donor site at the 3' end of an exon fuses to a splice acceptor site at the  
106 5' end of the same exon, or another upstream exon (Fu and Ares, 2014; Wang et al.,  
107 2021). circRNAs have been shown to play a regulatory role in multiple biological  
108 processes, including immune responses in both mammalian and plant systems (Hu et al.,  
109 2019; Mahmoudi et al., 2019; Fan et al., 2020; Zhang et al., 2020b). One mechanism by  
110 which circRNAs are thought to regulate gene expression is through acting as sponges for  
111 both miRNAs and RNA-binding proteins, and thereby sequestering them. Such  
112 sequestration can impact RNA transcription, splicing, and translation (Hansen et al.,

113 2013; Jeck and Sharpless, 2014; Bose and Ain, 2018; Panda, 2018). Fan et al. (2020)  
114 demonstrated that circRNAs from rice are involved in immune responses to the fungal  
115 pathogen *Magnaporthe oryzae*. Several circRNAs in rice leaves were detected only upon  
116 infection with *M. oryzae*. Furthermore, this work showed that overexpression of one  
117 specific circRNA enhanced rice immunity to *M. oryzae* (Fan et al., 2020), indicating that  
118 circRNAs may represent an important component of plant immune systems. However,  
119 whether circRNAs are secreted by plant cells, as they are by mammalian cells, has not  
120 yet been reported.

121 To understand the possible function of exRNAs in plants, we analyzed the sRNA  
122 and circRNA content of Arabidopsis apoplastic fluid both inside and outside EVs, as well  
123 as the RNA-binding proteins associated with these RNAs. Our data reveal that apoplastic  
124 fluid contains diverse RNA species, including sRNAs and lncRNAs (100 >1,000 nt), many  
125 of which appear to be circRNAs. The great majority of both sRNAs and lncRNAs were  
126 found to be located outside EVs. However, this extravesicular RNA is protected against  
127 degradation by RNases via association with RNA-binding proteins. The presence of  
128 abundant extravesicular sRNA- and circRNA-protein complexes in the apoplast suggests  
129 that these RNAs may play a central role in plant-microbe interactions and also contribute  
130 to host-induced gene silencing.

## 131 132 **RESULTS**

### 134 **The Majority of Apoplastic Small RNAs Are Located Outside EVs**

135 Our previous analyses of sRNAs associated with density gradient-purified EVs revealed  
136 that EVs contain relatively few RNAs in the 21, 22, and 24 nucleotide size range, and  
137 instead are highly enriched in RNAs 10-17 nucleotides in length, so-called tiny RNAs  
138 (tyRNAs) (Baldrich et al., 2019). Those analyses, however, did not assess whether these  
139 tyRNAs were located inside or outside the EVs and did not include any apoplastic sRNAs  
140 that pelleted at 40,000g but that did not co-purify with EVs in the density gradient. To  
141 assess whether apoplastic fluid contains RNA-associated particles other than EVs, we  
142 generated sRNA libraries from pellets obtained after centrifuging apoplastic wash fluid at  
143 40,000g for one hour (P40 pellets; see Materials and Methods). P40 pellets contain a  
144 mixture of particles, including EVs. To distinguish between RNA located inside EVs from

145 RNA located outside EVs, we treated P40 pellets with trypsin plus RNase A, which should  
146 eliminate RNA associated with proteins located outside EVs, while leaving RNAs located  
147 inside EVs intact. As controls, we treated pellets with just the buffer or with RNase A  
148 alone. The latter should degrade free RNA but not RNA bound to proteins or located  
149 inside EVs. Separate sRNA-seq libraries were generated from each of three biological  
150 replicates of each treatment (nine libraries in total) and sequenced using an Illumina  
151 NextSeq platform. We observed that the distribution of read lengths was consistent  
152 between replicates, but substantially different between treatments (Figure 1). Control  
153 samples displayed predominant peaks at 21, 22, and 31 nt, while RNase A alone treated  
154 samples displayed peaks at 16 and 17 nt and trypsin plus RNase A treated samples  
155 displayed peaks at 10 and 12 nt. These results are consistent with our previous analyses  
156 of density gradient-purified EVs in that EVs appear to contain very few 21, 22, or 24 nt  
157 sRNAs but are enriched in tyRNAs. Significantly, these results reveal that the apoplast  
158 contains large amounts of 21 and 22 nt RNAs that are located outside EVs and bound to  
159 proteins.

160 To further understand the nature of apoplastic sRNAs and tyRNAs, we analyzed  
161 their origin. We observed that most of the sRNA reads originated from rRNAs, mRNA,  
162 and products dependent on RNA Polymerase IV (Pol IV) (Figure 2). We also observed  
163 that the treatment with RNase A and trypsin had a different impact on each RNA category.  
164 While relative representation of mRNA and rRNA categories remained fairly constant after  
165 different treatments, the representation of Pol IV-, miRNA-, small nuclear RNA (snRNA)-  
166 and transposable element (TE)-derived sRNAs increased after RNase treatment and  
167 decreased after trypsin plus RNase A treatment (Figure 2A). This pattern suggests that  
168 Pol IV-, miRNA, snRNA- and TE-derived sRNAs are mostly located outside EVs but are  
169 protected from degradation due to association with proteins. In contrast, the relative  
170 amount of tRNA-derived sRNAs decreased after RNase treatment but increased after  
171 trypsin plus RNase treatment, suggesting that tRNA-derived sRNAs are present in the  
172 apoplast as unprotected RNAs outside EVs, as well as inside EVs. In the case of tyRNAs,  
173 we observed an increase in all categories after trypsin plus RNase treatment (Figure 2B).  
174 These patterns support our previous conclusion that tyRNAs are highly enriched inside  
175 EVs (Baldrich et al., 2019).

176

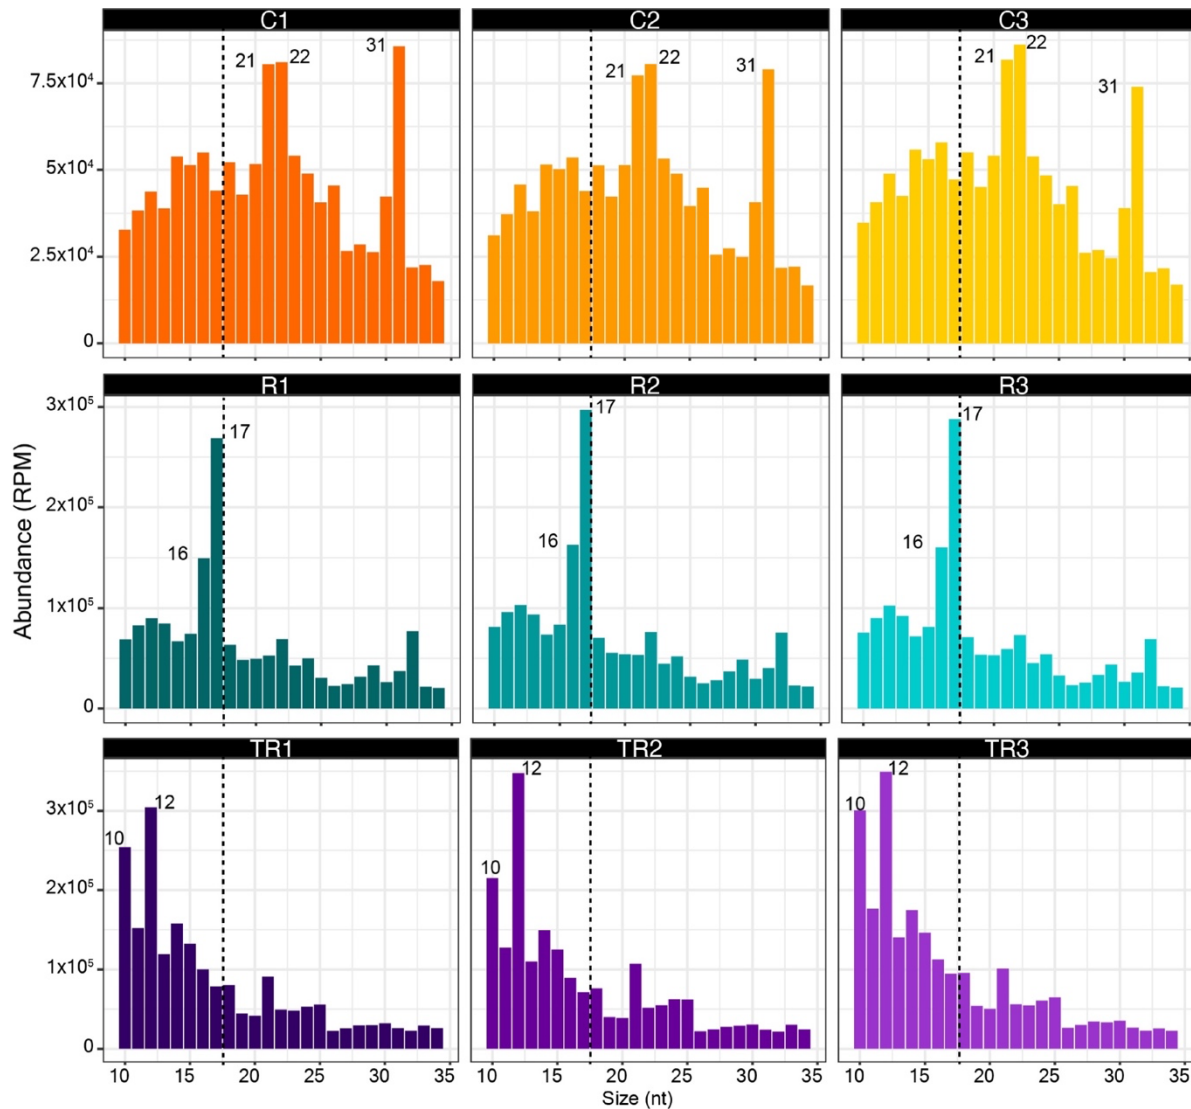

177

178 **Figure 1.** The Majority of Apolastic Small RNAs are Located Outside EVs.

179

180 Size distribution of P40 sRNAs mapping to the genome; the abundance of each size class was  
181 calculated for each P40 treatment (control (C1-C3), RNase A only (R1-R3), and trypsin plus  
182 RNase A (TR1-TR3)). The x axis indicates the sRNA size and the y axis indicates its abundance  
183 in reads per million (RPM). Data from three independent biological replicates are shown. Note the  
184 loss of 21 and 22 nt reads following treatment with trypsin plus RNase A, which indicates this size  
185 class is mostly found outside EVs.

186

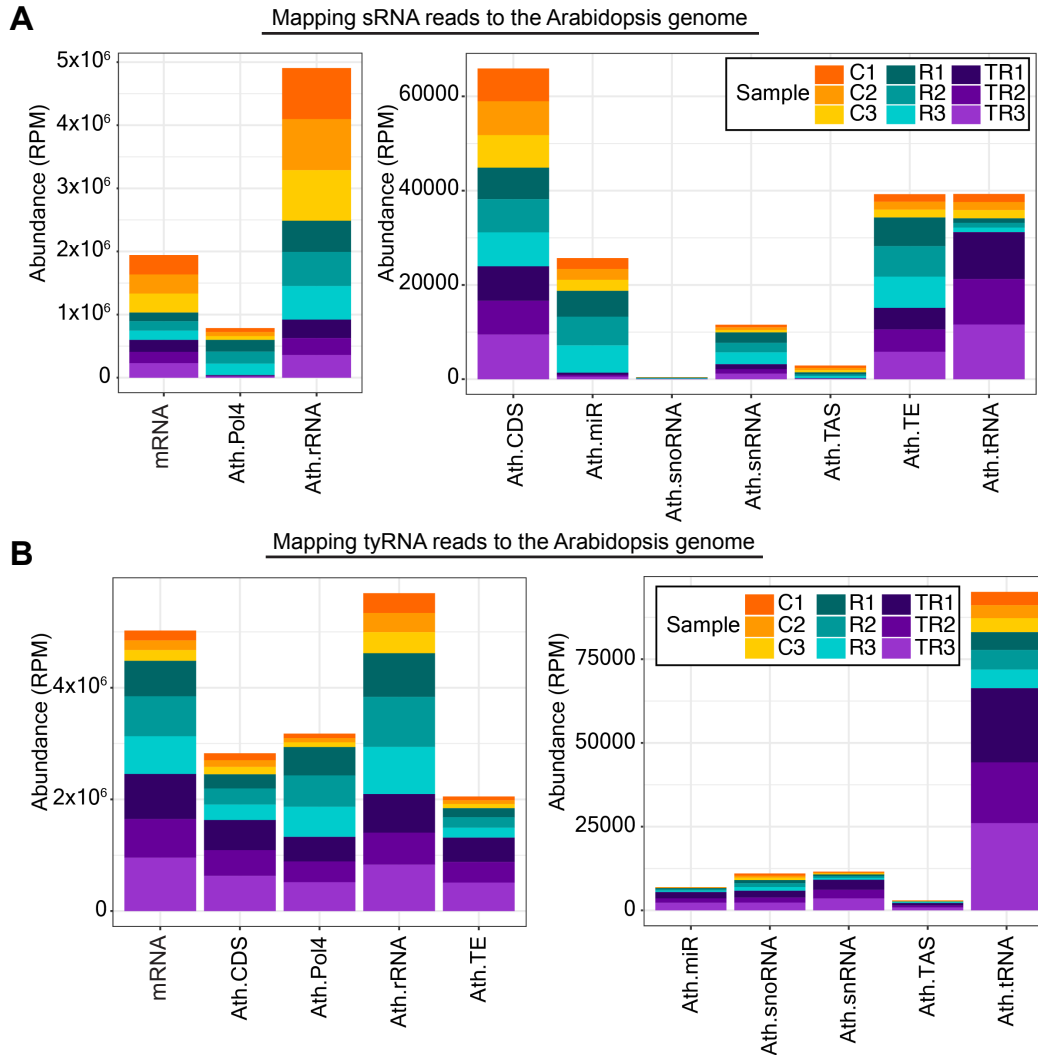

187

188 **Figure 2.** Apoplastic sRNAs Are Derived from Diverse Sources.

189

190 **(A)** Specific subclasses of sRNAs are protected by proteins. sRNAs that mapped to the genome  
 191 were categorized by origin and plotted by relative abundance in reads per million (RPM).  
 192 Treatment with RNase A alone (R1-R3) increased the relative proportion of Pol IV-, miRNA-,  
 193 snRNA- and TE-derived sRNAs, while treatment with trypsin plus RNase A (TR1-TR3) decreased  
 194 their proportion, indicating that the majority of these sRNAs are protected by protein and are  
 195 located outside EVs. TE, transposable element-derived RNA; snoRNA, small nucleolar RNA;  
 196 snRNA, small nuclear RNA; TAS, trans-acting siRNA.

197 **(B)** tyRNAs are mostly located inside EVs. tyRNAs that mapped to the genome were categorized  
 198 by origin and plotted by relative abundance. All categories of tyRNAs increased in relative  
 199 abundance upon treatment with trypsin plus RNase, indicating that they are protected against  
 200 trypsin plus RNase treatment, hence are mostly located inside EVs.

201 For both panels, the x axis indicates the RNA source, and the y axis indicates its abundance in  
 202 reads per million (RPM). Data from three independent biological replicates are stacked together  
 203 in a single bar plot and color coded as shown in the legend.



204 We further analyzed these sRNA-seq data by plotting the read-length  
205 distributions according to their origins (Supplemental Figure 1). As expected, read  
206 lengths for miRNAs and trans-acting siRNAs (tasiRNAs) displayed sharp peaks at 21 nt.  
207 Notably, this size distribution was not altered by treatment with RNase A alone, while  
208 treatment with trypsin plus RNase A eliminated the 21 nt peaks, leaving a peak at 10-12  
209 nt. These observations further support our conclusion that sRNAs are primarily located  
210 outside EVs and are protected by RNA binding proteins, while tyRNAs are located  
211 inside EVs.

212 Supplemental Figure 1 also revealed that the peak at 31 nt observed in Figure 1  
213 was almost entirely due to transcripts that overlap known Pol-IV-dependent 24 nt  
214 siRNAs (Zhou et al., 2018). Notably, this peak was eliminated by treatment with RNase  
215 A alone, leaving a peak at 16-17 nt. This observation suggests that these Pol IV-  
216 dependent transcripts are also located outside EVs but are only partially protected by  
217 RNA binding proteins. The observation that these transcripts are mostly 31 nt rather  
218 than 24 nt suggests that they are derived from precursor RNAs that did not complete  
219 maturation into 24 nt siRNAs by DICERLIKE 3 (DCL3) (Blevins et al., 2015).

220

### 221 **A Small Subset of miRNAs Are Enriched Inside EVs**

222 Although we observed that apoplastic miRNAs, overall, were much more abundant  
223 outside than inside EVs, this observation did not rule out the possibility that some miRNAs  
224 might be specifically loaded into EVs and thus could be enriched inside EVs relative to  
225 the general apoplastic miRNA population. To test this hypothesis, we compared the  
226 frequencies of individual miRNAs in each sample using a differential gene expression tool  
227 (see Methods). To avoid false negatives due to low expression, we selected only miRNAs  
228 with more than one read per million (RPM) in at least one sample. This filter reduced the  
229 dataset from 427 mature miRNAs to 94. From these, 62 miRNAs displayed differential  
230 accumulation in at least one of the comparisons (Figure 3). Based on the differential  
231 accumulation pattern, we placed the miRNAs into six clades. Clade I comprised seven  
232 miRNAs that were highly accumulated in the trypsin plus RNase A treated samples  
233 compared to control and RNase A alone treated samples but were not differentially  
234 accumulated in RNase A alone treated versus control samples. This is the pattern

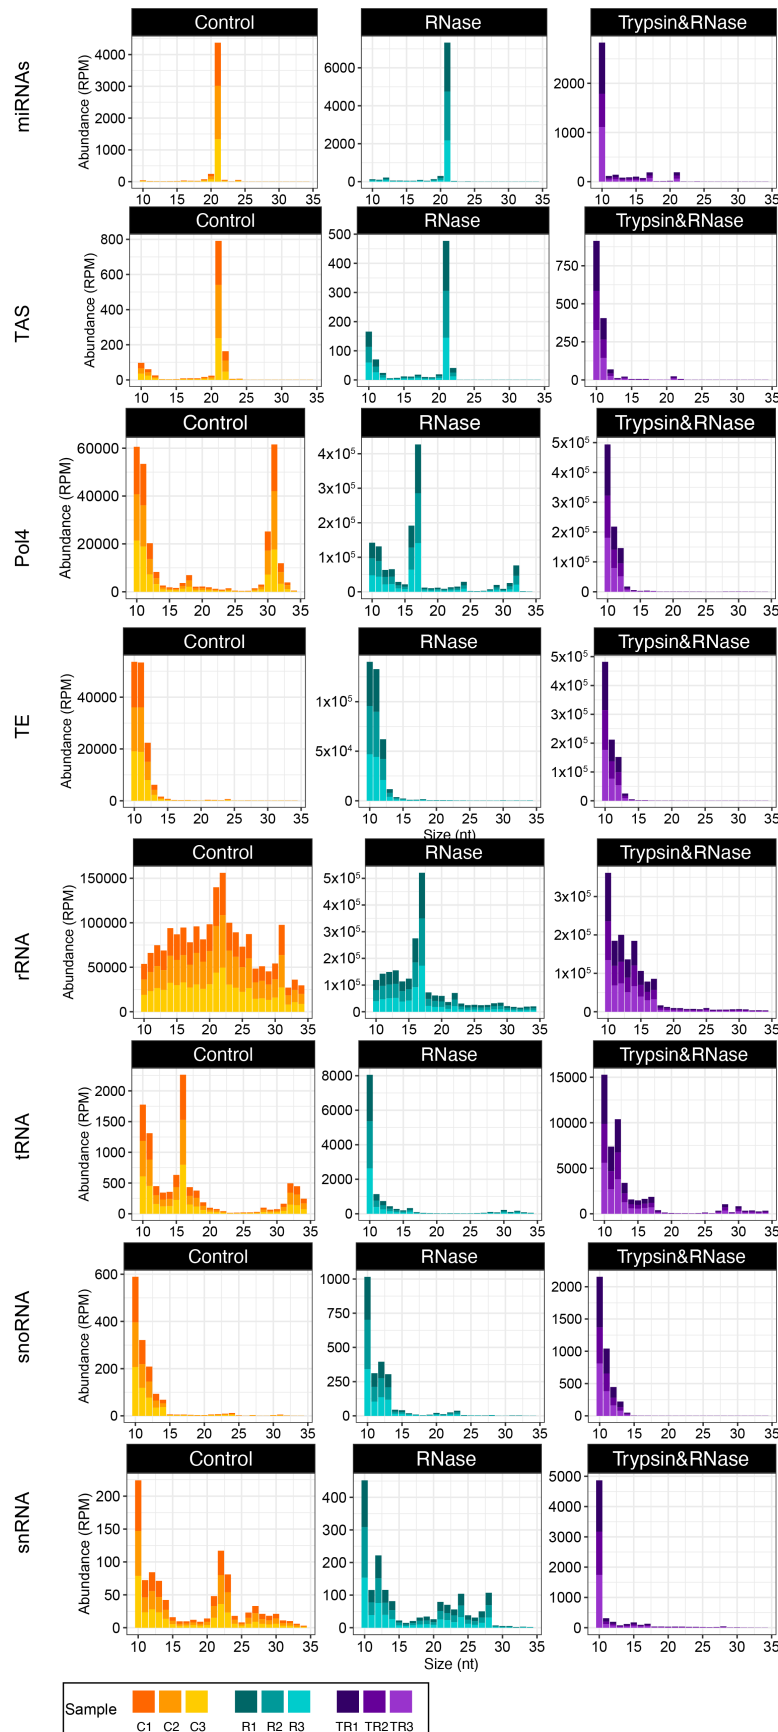

**Supplemental Figure 1.** Apoplastic miRNAs and trans-acting siRNAs are mostly located outside EVs and are protected by proteins.

Graphs indicate the size distributions of P40 sRNAs mapping to the indicated sources. The abundance of each size class was calculated for each P40 treatment: control (C), RNase A only (R), and trypsin plus RNase A (TR). The x axis indicates the sRNA size and the y axis indicates its abundance in reads per million (RPM). Data from three independent biological replicates are stack together in a single bar plot and color coded as shown in the legend.

236

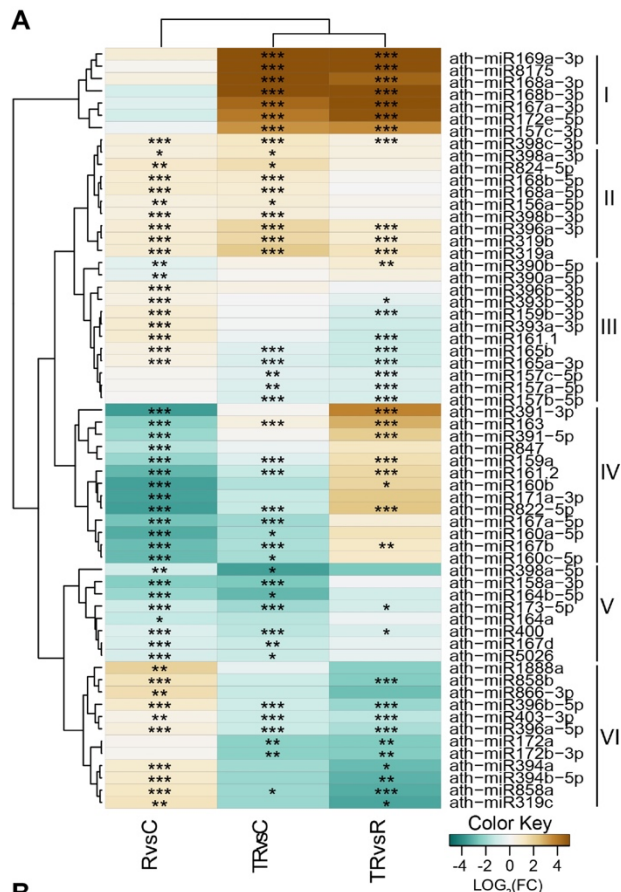

**Figure 3.** Apoplastic sRNAs are Mostly Found Outside EVs.

**(A)** Apoplastic miRNAs with a minimum abundance of one read per million in at least one treatment and differentially accumulated in at least one comparison were grouped into six clades based on their relative abundance following three different treatments: RNase A alone (R), trypsin plus RNase A (TR), or no treatment (C). Heat map indicates enrichment (brown) or depletion (teal) in one treatment compared to another.

**(B)** Apoplastic tasiRNAs with a minimum abundance of five reads per million in at least one treatment and differentially accumulated in at least one comparison were grouped into five clades based on their relative abundance. Red hashtags indicate tasiRNAs previously reported to mediate silencing of genes in the fungus *Botrytis cinerea* (Cai et al., 2018; He et al., 2021). Heat map indicates enrichment (brown) or depletion (teal) in one treatment compared to another.

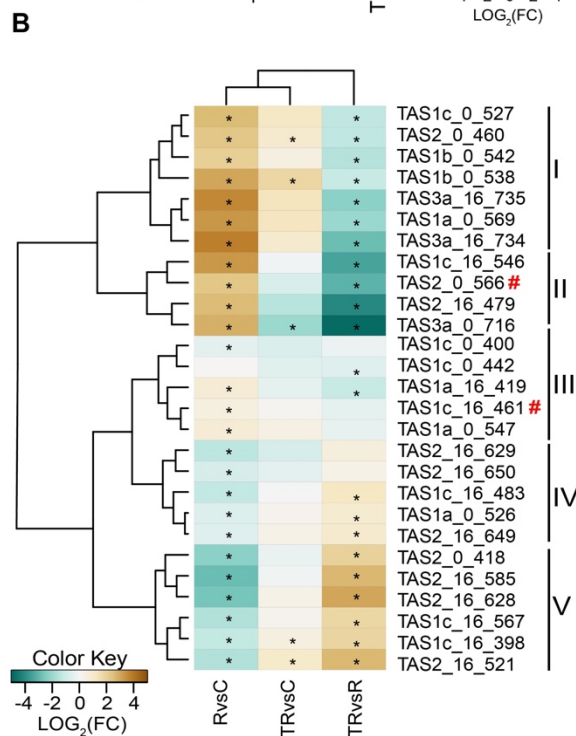

237

238 expected for miRNAs located inside EVs, which should be protected against RNase A  
239 degradation regardless of trypsin treatment. Clade II comprised ten miRNAs that were  
240 significantly more abundant in the RNase A alone treated samples relative to the control  
241 samples, and in the trypsin plus RNase A treated samples relative to controls, with three  
242 of these also being significantly more abundant in the trypsin plus RNase A samples  
243 versus the RNase A alone samples. This pattern would be expected for miRNAs that are  
244 located both inside EVs and outside EVs, with the latter being protected against RNase  
245 digestion by proteins. Clades III and VI contained 24 miRNAs that exhibited low  
246 accumulation in trypsin plus RNase A treated samples compared to control and RNase A  
247 alone treated samples but high accumulation in RNase A alone treated samples  
248 compared to the controls. This pattern is expected for miRNAs that are located outside  
249 EVs and protected by RNA-binding proteins. The miRNAs found in Clade IV (13 total)  
250 and Clade V (8 total) exhibited low abundance in RNase A alone treated samples versus  
251 controls as well as trypsin plus RNase A alone versus controls. These are most likely  
252 miRNAs that are located outside EVs and are not protected by proteins. In summary,  
253 these data indicate that most plant miRNA species in the apoplast are located outside  
254 EVs, with only seven miRNAs apparently enriched inside EVs.

255

### 256 **Apoplasmic tasiRNAs Are Mostly Located Outside EVs**

257 Trans-acting siRNAs (tasiRNAs) are a subclass of sRNAs that have been  
258 proposed to mediate interkingdom RNA interference, possibly by transfer inside of plant  
259 EVs (Cai et al., 2018a; He et al., 2021). The analyses presented in Figure 1 and  
260 Supplemental Figure 1, however, indicate that siRNAs are mostly located outside EVs.  
261 To determine whether there may be a specific subset of tasiRNAs that are preferentially  
262 loaded inside EVs, we performed a differential accumulation analysis of tasiRNAs, just as  
263 described above for miRNAs. To avoid false positives, we established a minimum cut-off  
264 of five RPM in at least one sample, reducing the number from 1581 to 27 tasiRNAs. Of  
265 these, all exhibited a differential accumulation that was statistically significant in at least  
266 one comparison (Figure 3B). Based on differential abundance in the three samples, we  
267 could group these 27 tasiRNAs into five clades.

268 Clade I (seven tasiRNAs) showed significantly higher relative abundance in RNase  
269 A alone treated samples compared to control samples, suggesting these tasiRNAs are  
270 located outside EVs and are protected by proteins. Consistent with this conclusion, these  
271 seven tasiRNAs were relatively less abundant in trypsin plus RNase A treated samples  
272 compared to RNase A alone treated samples. Clade II tasiRNAs (four tasiRNAs) showed  
273 a very similar pattern to that of Clade I tasiRNAs, thus are also likely to be located outside  
274 EVs and protected by proteins.

275 Clades III (three tasiRNAs) and IV (eight tasiRNAs) showed a relative abundance  
276 pattern opposite to that of clades I and II, with treatment with RNase A alone leading to a  
277 decrease in relative abundance compared to control samples, and treatment with trypsin  
278 plus RNase A causing an increase compared to RNase A alone treated samples. This  
279 pattern suggests that tasiRNAs belonging to clades III and IV are located outside EVs  
280 and are not protected by proteins, although why trypsin plus RNase A treatment leads to  
281 less efficient removal than RNase A alone is unclear. We speculate that residual trypsin  
282 activity in the former may lead to a slight reduction in RNase activity.

283 Lastly, the five tasiRNAs included in clade V showed a pattern more similar to  
284 clades I and II, suggesting that these are located outside EVs and are mostly protected  
285 by proteins. Notably, none of the tasiRNAs showed a pattern that would be consistent  
286 with protection inside EVs, which should show a relative increase in abundance across  
287 all three comparisons.

288 It has been previously reported that two tasiRNAs from Arabidopsis, Tas1c-siR483  
289 (here named Tas1c\_16\_461) and Tas2-siR453 (here named as Tas2\_0\_566) are  
290 transferred into fungal cells via extracellular vesicles. However, in our study, we found  
291 that these two TAS-derived siRNAs are present outside EVs, in association with RNA-  
292 binding proteins (indicated by red # symbol in Figure 3B).

### 293 **Apoplasmic Wash Fluid Contains Long RNAs That Are Protected by RNA-Binding** 294 **Proteins**

295  
296  
297 The above analyses revealed that Arabidopsis apoplasmic fluid contains sRNA-  
298 protein complexes that are located outside EVs, thus defining a new class of extracellular  
299 RNA in plants. Recent work in mammalian systems has revealed that mammalian cells

300

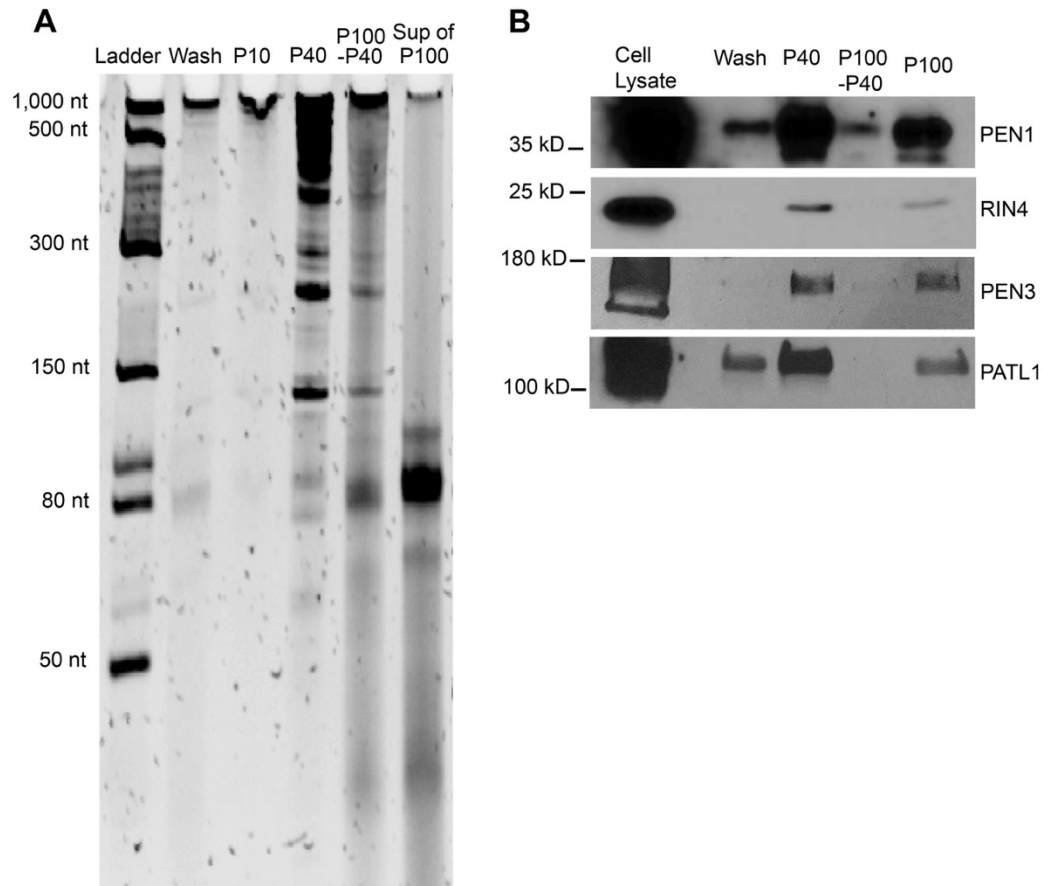

301

302 **Figure 4.** Apoplasmic Fluid Contains Long RNAs.

303

304 **(A)** Long RNAs are present in apoplasmic fluids and can be pelleted by ultracentrifugation. RNA  
305 was isolated from the indicated fractions using TRIzol extraction and then separated on a 40%  
306 denaturing polyacrylamide gel, followed by staining with SYBR® Gold nucleic acid stain. P10,  
307 P40 and P100-40 indicate RNA isolated from pellets obtained in successive centrifugation steps  
308 at 10,000g (P10), 40,000g (P40), and 100,000g (P100-P40). 'Sup of P100' indicates the RNA  
309 remaining in the supernatant after the 100,000g centrifugation step. Note that the majority of the  
310 RNA larger than 50 nt is pelleted at 40,000g, indicating it is associated with particles of some  
311 kind.

312 **(B)** EVs are pelleted at 40,000g. EV marker proteins PEN1, RIN4, PEN3, and PATL1 all  
313 pelleted at 40,000g (P40), with very little remaining in the P100-P40 pellet. 'P100' indicates a  
314 sample obtained by skipping the 40,000g step, going directly to a 100,000g centrifugation step  
315 following the 10,000g centrifugation step.

316

317 secrete lncRNAs independent of EVs (Lasda and Parker, 2016; Preußner et al., 2018). We  
318 thus investigated whether plants might also secrete lncRNAs that are extravesicular. For  
319 these analyses, we collected apoplastic wash fluid from Arabidopsis leaves using the  
320 same protocol as used for sRNA isolation (Rutter and Innes, 2017). The resulting  
321 apoplastic wash fluid was filtered and centrifuged successively at 10,000g, 40,000g, and  
322 100,000g. RNAs were isolated after each centrifugation step and analyzed by  
323 polyacrylamide gel electrophoresis, followed by staining with SYBR® Gold to detect  
324 nucleic acids. These analyses revealed that apoplastic wash fluid contains abundant long  
325 RNAs ranging in size from 35 nt to at least 1,000 nt (Figure 4). Most of the apoplastic  
326 RNAs were pelleted by centrifuging the wash fluid at 40,000g (P40) (Figure 4A), which  
327 we have previously shown pellets EVs (Rutter and Innes, 2017).

328 Some apoplastic RNAs remained in the supernatant after the 40,000g step, but  
329 were pelleted after centrifuging at 100,000g (P100-P40), which indicates the presence of  
330 some apoplastic RNAs that are not associated with EVs (Figure 4A). To assess the  
331 presence of EVs in both the P40 and P100-P40 fractions, we tested for the known EV  
332 protein markers PEN1, PEN3, PATL1, and RIN4 (Figure 4B). Consistent with our previous  
333 work (Rutter and Innes, 2017), these markers were found almost entirely in the P40  
334 fraction. Thus, EVs are concentrated in the P40 fraction, while non-EV components,  
335 including some apoplastic RNAs, can be found in the P100-P40 fraction.

336 We also observed an abundant RNA smear running between 80 nt and  
337 approximately 100 nt in the supernatant following the 100,000g step (Figure 4A). This  
338 size distribution is similar to that of eukaryotic tRNAs (76-90 nt), and our previous sRNA-  
339 seq analyses on the supernatant of P40 pellets revealed abundant tRNA sequences  
340 (Baldrich et al., 2019). We thus speculate that this smear corresponds to free tRNAs.

341 These data indicate that apoplastic wash fluid contains multiple species of RNA,  
342 including many RNAs that are longer than 100 nt. These long RNAs must be associated  
343 with some kind of particle, as they all pellet when centrifuged at 100,000g for one hour.  
344 To distinguish RNAs encapsulated in EVs from those located in non-vesicular protein-  
345 based particles, we treated the P40 fraction with trypsin to digest extravesicular proteins  
346 and then with RNase A to digest RNAs (Figure 5). Notably, the majority of the P40 RNA  
347

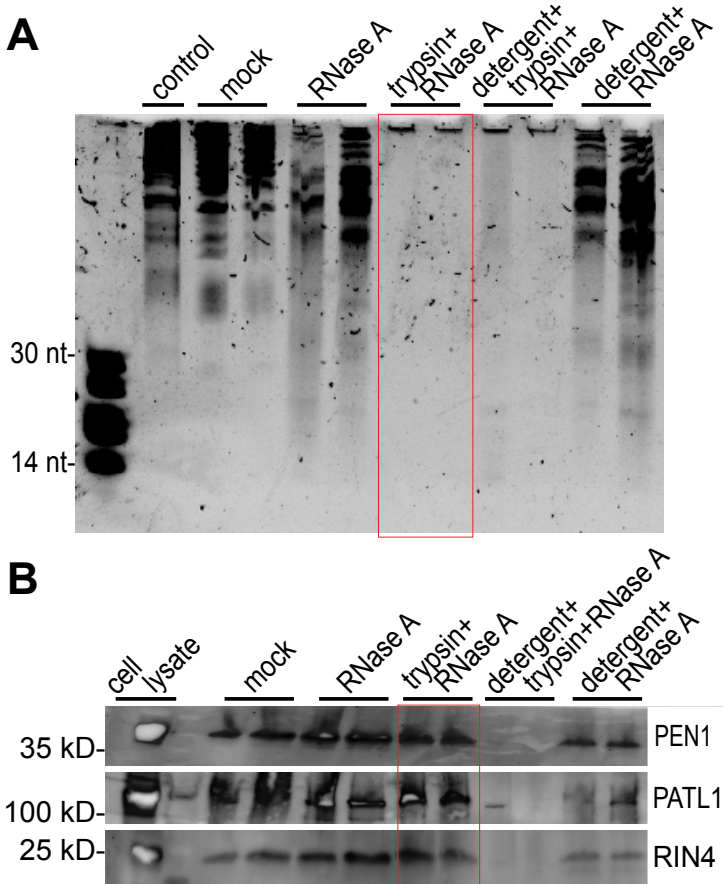

348  
349

350 **Figure 5.** Apoplastic Long RNAs are Protected Against RNase A Digestion by Proteins.

351

352 **(A)** RNase A treatment alone does not degrade most apoplastic RNA. P40 pellets were  
353 subjected to treatment with RNase A, trypsin plus RNase A, Triton X-100 detergent plus trypsin  
354 plus RNase A, or detergent plus RNase A. Control is input RNA without any treatments and kept  
355 on ice; Mock is the same RNA subjected to the same incubations as the treated RNA, but  
356 without detergent, RNase A or trypsin. RNA was analyzed using a denaturing PAGE gel as  
357 described in Figure 4.

358 **(B)** RNase A and trypsin do not disrupt EVs. The P40 pellets from panel A were analyzed by  
359 immunoblots prior to RNA extraction to assess whether EVs remained intact. EV cargo proteins  
360 PEN1, PATL1 and RIN4 were degraded by trypsin only when detergent was included, which  
361 indicates EVs remained intact following treatment with trypsin plus RNase A.

362



363  
364 was not digested by treatment with RNase A alone, but was completely degraded by  
365 treatment with trypsin followed by RNase A. To rule out the possibility that trypsin plus  
366 RNase A treatment was disrupting the integrity of EVs, we also analyzed these samples  
367 for the presence of the known EV cargo proteins PEN1, PATL1 and RIN4 (Figure 5B). All  
368 three proteins were intact in the trypsin plus RNase A treated sample but were missing  
369 from the detergent plus trypsin plus RNase A treated sample, indicating that the EVs  
370 remained intact during the trypsin plus RNase A treatment. Collectively, these results  
371 show that the majority of apoplasmic RNA is located outside EVs but is protected against  
372 RNase digestion by RNA-binding proteins.

373

### 374 **Apoplasmic RNA Contains Circular RNAs**

375 To our knowledge, long extracellular RNAs have not been reported previously in  
376 plants. In mammals, however, exRNAs have been extensively characterized due, in part,  
377 to their potential use as non-invasive markers for diseases such as cancer (Zhan et al.,  
378 2018). Notably, mammalian exRNAs are highly enriched in circRNAs, possibly due to  
379 their resistance to digestion by extracellular RNases (Li et al., 2015; Chen and Huang,  
380 2018; Seimiya et al., 2020). To assess whether plant exRNAs also contain circRNAs, we  
381 performed RNase R treatment on exRNAs isolated from P100 pellets. This enzyme is a  
382 3' to 5' exoribonuclease that digests most linear RNAs, including structured RNAs such  
383 as rRNA, but leaves circRNAs intact (Vincent and Deutscher, 2006). The RNase R  
384 treated RNA was then analyzed by denaturing polyacrylamide gel electrophoresis, which  
385 revealed that a large amount of RNA larger than 300 nt remained undigested, along with  
386 several distinct bands shorter than 300 nt (Figure 6). As a control, we homogenized whole  
387 Arabidopsis leaf tissue and subjected it to purification using our EV isolation protocol. The  
388 RNA obtained from this preparation displayed a banding pattern entirely different from  
389 that of the P100 RNA, and RNase R treatment eliminated all visible RNA larger than 150  
390 nt. These results indicate that plant exRNA is enriched in circRNAs.

391 To confirm this conclusion, we generated RNA-seq libraries from P100 RNA that  
392 had been treated with RNase R and then mapped the reads from these libraries to a  
393 collection of previously identified Arabidopsis circRNAs (Chu et al., 2017), which are

394

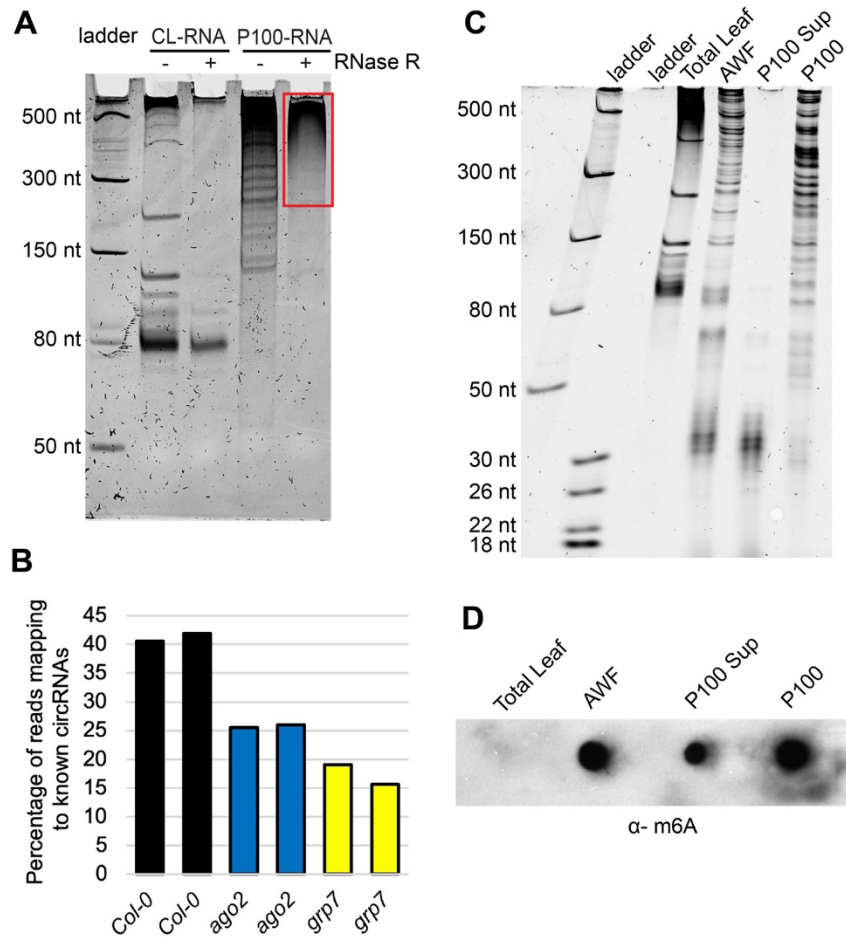

395  
396

397  
398

**Figure 6.** Apoplastic RNAs Are Enriched in circRNAs and m<sup>6</sup>A Modification.

399 **(A)** Apoplastic fluid contains circRNAs. RNA from a P100 pellet and from total cell lysate (CL)  
400 purified using our P100 protocol was treated with RNase R, which degrades linear RNAs. RNAs  
401 were then analyzed using denaturing polyacrylamide gel electrophoresis and staining with  
402 SYBR® Gold. Red box indicates RNase R-resistant RNA.

403 **(B)** Apoplastic RNA contains diverse circRNAs. P100 RNA was treated with RNase R to remove  
404 linear RNA, and then analyzed by RNA-seq using an Illumina NextSeq platform. Graphs  
405 indicate the percentage of reads that mapped to known Arabidopsis circRNAs for RNA isolated  
406 from wild-type, *ago2* mutant, and *grp7* mutant Arabidopsis plants.

407 **(C)** Confirmation of RNA concentrations and integrity prior to m<sup>6</sup>A analysis. 200 ng of the  
408 indicated RNAs were separated on a 15% denaturing PAGE gel and stained with SYBR® Gold.

409 **(D)** Apoplastic RNAs are enriched in m<sup>6</sup>A modification. 200 ng of each of the indicated RNAs  
410 from panel C were dot-blotted onto a nitrocellulose membrane and then probed with an anti-  
411 m6A antibody.

412  
413

414 defined by the presence of junction fragments derived from back-splicing events (Ye et  
415 al., 2019). Consistent with our RNase R analysis, we found that apoplastic RNA contains  
416 abundant circRNAs, with over 40% of the reads mapping to known Arabidopsis circRNAs  
417 (Figure 6B).

418

### 419 **Apoplastic RNA is Enriched in m<sup>6</sup>A Modification**

420 In mammalian systems, circRNA biogenesis often involves post-transcriptional  
421 modification with N<sup>6</sup>-methyladenine (m<sup>6</sup>A), which promotes back-splicing, with the  
422 resulting circRNAs containing multiple m<sup>6</sup>A sites (Di Timoteo et al., 2020; Zhang et al.,  
423 2020a). We thus assessed whether apoplastic RNA might be enriched in m<sup>6</sup>A  
424 modification. We isolated RNA from whole leaves, from total apoplastic wash fluid, from  
425 P100 pellets and from the supernatant of P100 pellets. The concentrations of these RNA  
426 preparations were then determined using a NanoDrop spectrophotometer and their  
427 concentrations equalized. To confirm that RNA samples contained equivalent amounts of  
428 RNA, 200 ng aliquots were analyzed on a PAGE gel stained with SYBR® Gold (Figure  
429 6C). RNA samples (200 ng each) were then dot-blotted onto a nitrocellulose membrane  
430 and probed with an anti-m<sup>6</sup>A antibody. This analysis revealed that exRNA is highly  
431 enriched in m<sup>6</sup>A modification relative to total cellular RNA (Figure 6D). Notably, RNAs  
432 isolated from the P100 and supernatant of the P100 both displayed a strong signal. The  
433 latter contains mostly RNAs that are smaller than 50 nt, while the former contains RNAs  
434 larger than 50 nt. This observation suggests that both small RNAs and long RNAs may  
435 be enriched in m<sup>6</sup>A modification.

436

### 437 **Apoplastic RNA is Enriched in Intergenic RNAs**

438 To determine the sources of apoplastic RNA, we performed Illumina-based RNA-seq  
439 analysis on RNA isolated from P40 pellets. We generated two sets of RNA-seq libraries,  
440 one using a poly(A) enrichment protocol, and one using an rRNA depletion protocol (see  
441 Methods). Analysis of the poly(A)-enriched library revealed that it contained very few  
442 products with inserts (Supplemental Figure 2), indicating that apoplastic RNA contains  
443 very little intact mRNA. This finding also indicates that there was little to no contamination

444

**A**

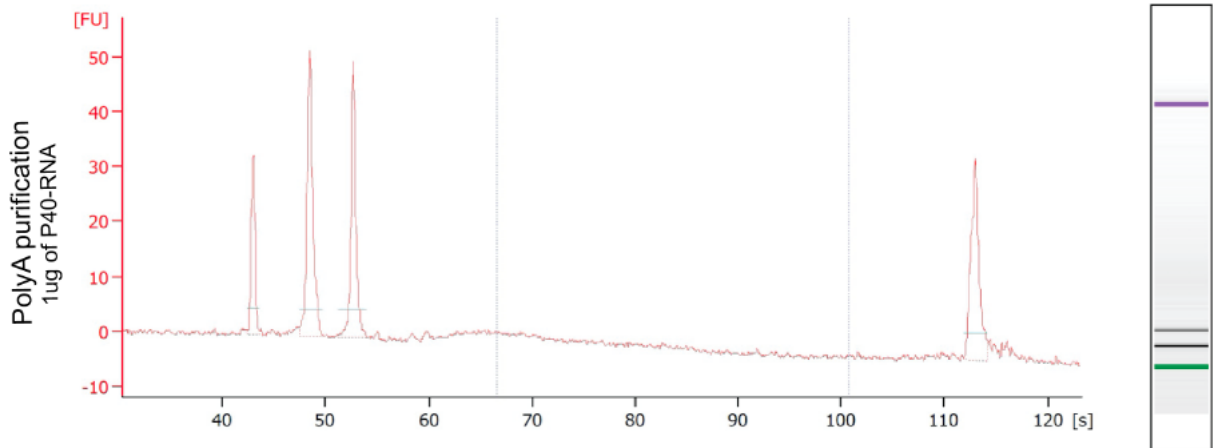

**B**

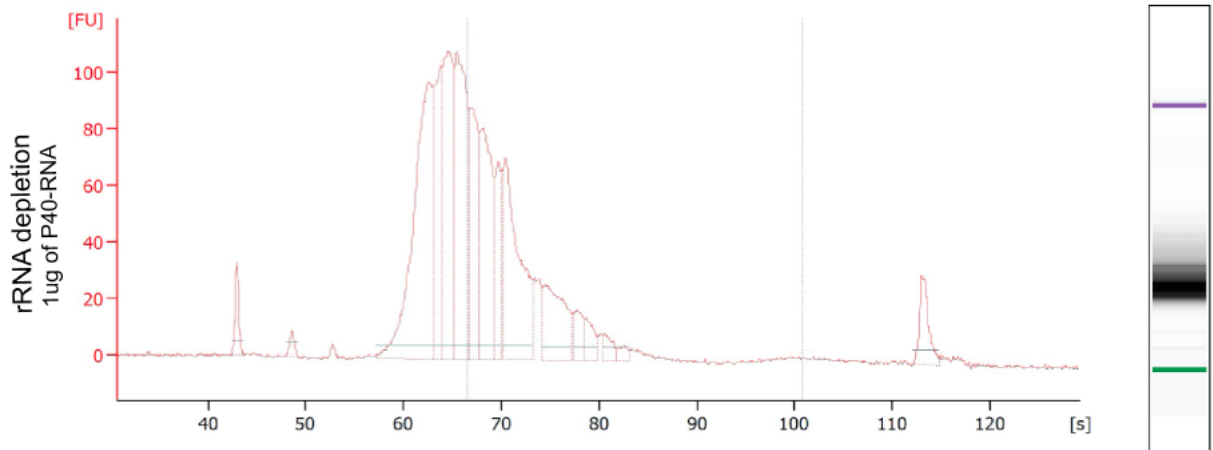

**Supplemental Figure 2. P40 RNA Appears to Lack Poly-Adenylated RNA.**

RNA-seq libraries were prepared from P40 RNA using two different methods.

**(A)** Method 1 employed a poly(A) enrichment step to specifically copy poly-adenylated mRNAs. Analysis of the sizes of the inserts in the resulting library using an Agilent Tape Station revealed that most products lacked an insert, indicating a lack of full-length mRNAs in the P40 fraction.

**(B)** The second method used a ribosomal RNA depletion step, but no poly(A) enrichment step. This library produced products with the expected size range of inserts (note broad peak between 60 and 80 seconds).

445

446

447 with RNA from broken cells. In contrast, the second library looked as expected, thus was  
448 analyzed using Illumina sequencing. Mapping of the resulting reads to the Arabidopsis  
449 genome revealed that the majority of the reads were derived from ribosomal RNA and  
450 intergenic regions but also included a large number of reads derived from protein-coding  
451 genes (Figure 7). Notably, the latter reads included a large number of reads derived from  
452 introns, similar in number to those derived from exons, suggesting that exRNAs are  
453 enriched in incompletely spliced, or alternatively spliced RNAs. This observation is  
454 consistent with the presence of circRNAs, which often include introns.

455 To assess whether specific RNA species were associated with protein or were  
456 encapsulated inside EVs, we also made libraries from P40 pellets that were treated with  
457 RNase A alone (this should eliminate RNA that is not protected by proteins or EVs) or  
458 treated with trypsin plus RNase A (this should leave mostly RNA encapsulated in EVs).  
459 Analysis of these libraries revealed that trypsin plus RNase A reduced the relative  
460 proportion of most classes of exRNA (Figure 7), consistent with our conclusion that the  
461 vast majority of exRNA is located outside EVs but is protected by proteins. Notably,  
462 treatment with RNase A alone increased the relative frequency of RNAs that mapped to  
463 transposable elements and introns, which suggests that these RNAs are especially well-  
464 protected by proteins. In contrast, RNA reads mapping to 5' UTRs, 3' UTRs, and tRNAs  
465 became relatively more abundant following trypsin plus RNase A treatment (Figure 7),  
466 suggesting that these RNAs might be protected inside EVs. We interpret these data with  
467 caution, however, as these reads made up a very small fraction of the total reads. It is  
468 worth noting, also, that based on paired-end sequence reads, most of the tRNA  
469 sequences were derived from tRNA fragments and not full-length tRNAs.

470

### 471 **RNA-binding Proteins GRP7 and AGO2 Are Secreted into the Apoplast Independent** 472 **of EVs**

473 The above analyses revealed that apoplastic wash fluid contains abundant RNA  
474 species, including both sRNAs and long RNAs, that are protected from RNase  
475 degradation by proteins. This raised the question of what RNA-binding proteins are  
476 present in the apoplast. In our previous proteomic analyses of density-gradient purified

477

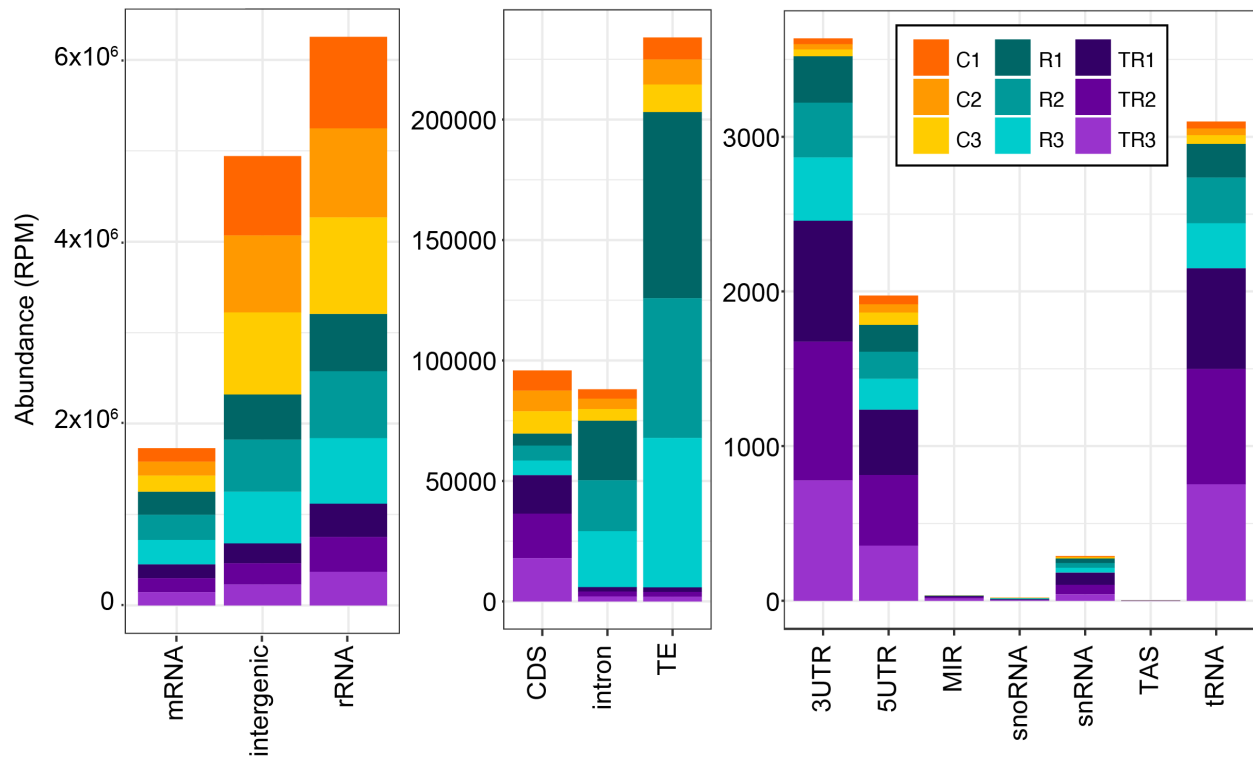

478

479

480 **Figure 7.** Apoplastic RNA is Derived from Multiple Sources, and Is Enriched in

481 Intergenic RNA.

482

483 RNA-seq reads were mapped to the Arabidopsis genome and categorized as indicated on the  
 484 X-axis and quantified on the Y-axis by reads per million (RPM). Note the difference in scales for  
 485 the three graphs, which were used to better visualize the lower abundance categories. Reads  
 486 that mapped to protein coding genes (mRNA) (left graph) were further broken down into 5'  
 487 untranslated region (5UTR), 3' untranslated region (3UTR), protein coding sequence (CDS) and  
 488 intron. MIR, miRNA encoding gene; snoRNA, small nucleolar RNA; snRNA, small nuclear RNA;  
 489 TAS, trans-acting siRNA-producing loci; TE, transposable elements; tRNA, transfer RNA. The  
 490 values for three independent biological replicates from each of three treatments are shown.  
 491 Treatments were control untreated RNA (C1-C3), RNase A-treated RNA (R1-R3) and trypsin  
 492 plus RNase A-treated RNA (TR1-TR3).

493

494

495

496 EVs, we had identified the RNA-binding protein GLYCINE-RICH PROTEIN 7 (GRP7) as  
497 co-purifying with EVs (Rutter and Innes, 2017). GRP7 has two RNA-binding domains and  
498 binds to multiple species of RNA, including sRNAs, pre-miRNA, precursors of miRNAs  
499 and pre-mRNAs (Koster et al., 2017, Streitner et al., 2012, Nicaise et al., 2013).  
500 Arabidopsis GRP7 has been shown to participate in plant responses to pathogen infection  
501 (Fu et al., 2007, Lee et al., 2012, Nicaise et al., 2013). In addition, it is targeted by the  
502 bacterial type III- secreted effector HopU1, which blocks the interaction between GRP7  
503 and GRP7-associated mRNAs, resulting in a reduction in translation of defense-related  
504 proteins (Nicaise et al., 2013). It has also been shown that Arabidopsis GRP7 regulates  
505 alternative splicing of pre-mRNAs and directly binds to pre-mRNAs, modulating  
506 alternative splicing (Streitner et al., 2012). All of these observations made GRP7 a prime  
507 candidate for further analysis with regard to its role in exRNA production and/or  
508 accumulation.

509 To confirm that GRP7 is secreted into the apoplast, we performed immunoblots on  
510 protein isolated from the P40 and P100-P40 fractions of an Arabidopsis line expressing  
511 GRP7-GFP expressed under its native promoter (Figure 8). These analyses revealed that  
512 GRP7 is mostly detected in the P100-P40 fraction, and therefore likely is not located  
513 inside EVs, which mostly pellet in the P40 fraction. To confirm that GRP7 is located  
514 outside EVs, we performed a protease protection assay. GRP7 was degraded in the  
515 absence of detergent, indicating that it is located outside EVs (Figure 8B).

516 In parallel to our analyses on GRP7, we also assessed whether the sRNA-binding  
517 protein ARGONAUTE2 (AGO2) was present in apoplastic wash fluid. AGO2 was chosen  
518 from among the ten Arabidopsis AGO proteins because of (1) a known role in plant-  
519 pathogen interactions (Harvey et al., 2011), and (2) the availability of a high-quality  
520 commercial antibody from Agrisera. Our analyses revealed that, like GRP7, AGO2 is also  
521 present in the apoplast, with the majority of it located outside EVs (Figures 8A and 8B).

522

523

524

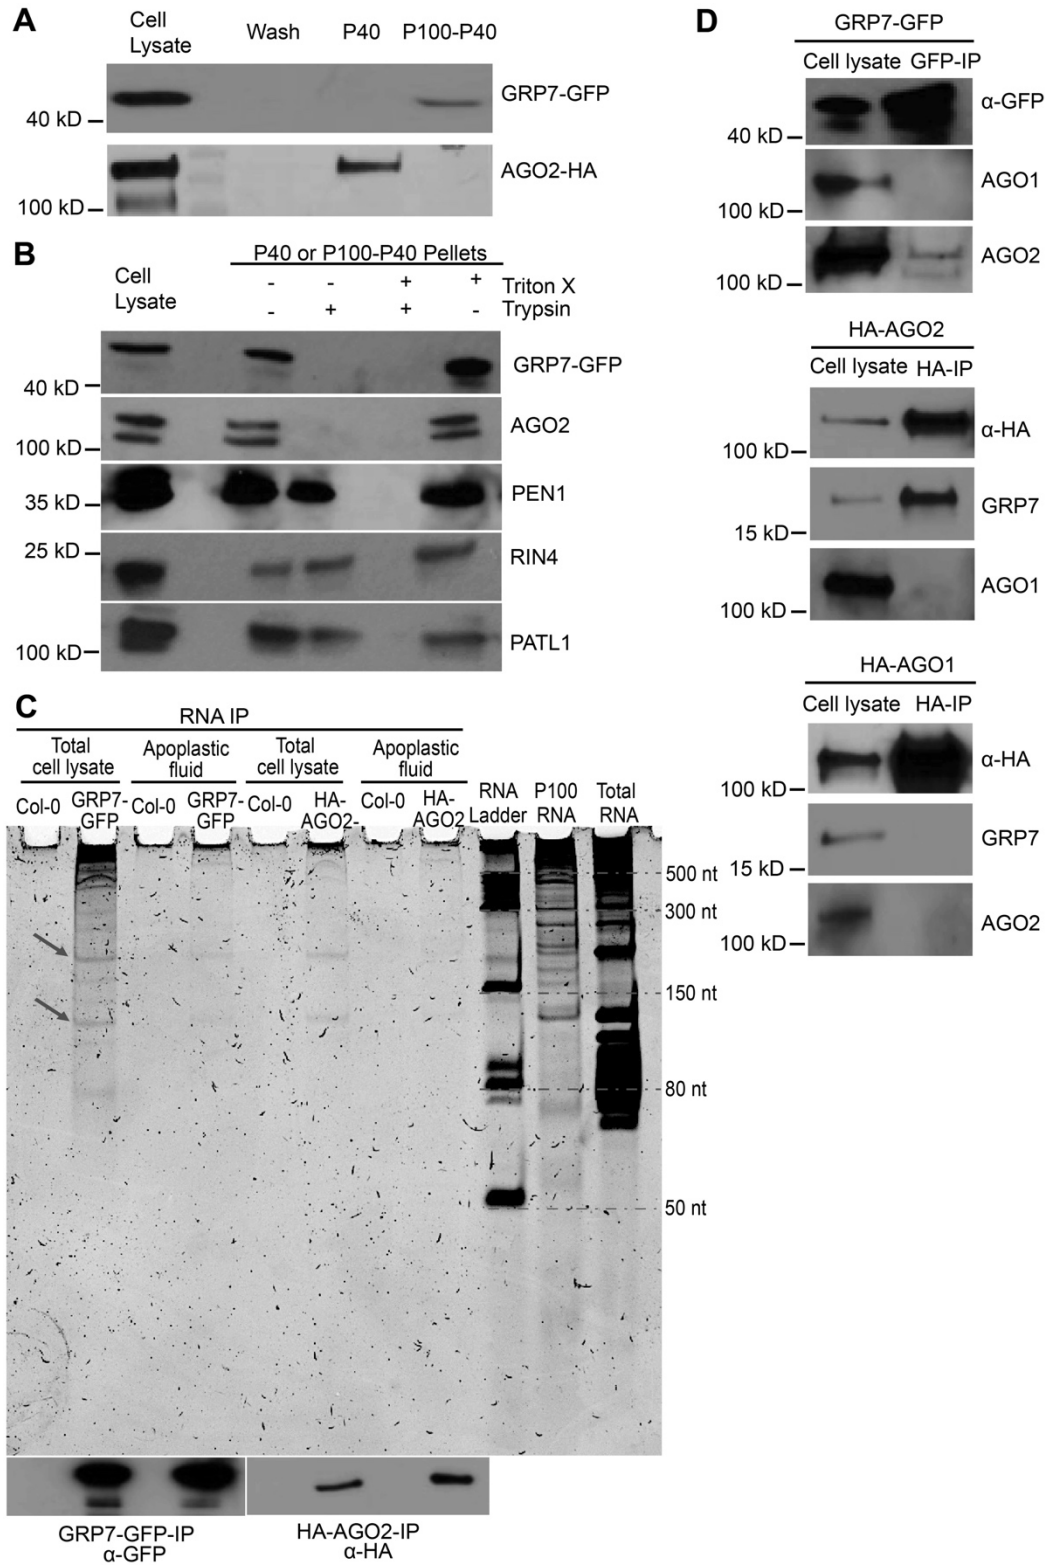

525  
526  
527

**Figure 8.** GRP7 and AGO2 Are Secreted to the Apoplast Independent of EVs and Bind to lncRNAs.



528

529 **(A)** GRP7 and AGO2 are present in the apoplast. Apoplastic fluid was isolated from HA-tagged  
530 AGO2 and GFP-tagged GRP7 transgenic Arabidopsis and pelleted at 40,000g (P40) followed by  
531 another round of centrifugation at 100,000g (P100-P40). Apoplastic HA-AGO2 mostly pelleted at  
532 40,000g, whereas GRP7-GFP mostly pelleted at 100,000g (P100-P40). Wash; 40  $\mu$ L of apoplastic  
533 wash prior to ultracentrifugation.

534 **(B)** GRP7 and AGO2 are located outside EVs. GRP7- and AGO2-containing pellets were treated  
535 with trypsin with or without detergent. GRP7 and AGO2 were eliminated even in the absence of  
536 detergent, while known EV cargo proteins PEN1, RIN4 and PATL1 were not.

537 **(C)** GRP7 and AGO2 bind to lncRNAs. RNAs isolated from GRP7-GFP-RNAIP and HA-AGO2-  
538 RNAIP were separated by size in a 15% denaturing polyacrylamide gel. Non-transgenic wild-  
539 type Arabidopsis was used as a negative control.

540 **(D)** GRP7 and AGO2 co-immunoprecipitate. Whole cell lysates from transgenic plants  
541 expressing GRP7-GFP under a GRP7 native promoter, or HA-AGO1, or HA-AGO2 under their  
542 respective promoters, were immunoprecipitated with anti-GFP or anti-HA beads. Untagged  
543 AGO1, AGO2 and GRP7 proteins were detected using antibodies raised to those proteins.  
544 AGO2 coimmunoprecipitated with GRP7-GFP, while AGO1 did not. Reciprocally, anti-HA  
545 immunoprecipitation of cell lysates from HA tagged AGO1 and AGO2 plants showed interaction  
546 between AGO2 and GRP7, but not between AGO1 and GRP7.

547

## 548 **GRP7 and AGO2 Associate with lncRNAs in the Apoplast**

549 To investigate the RNAs associated with GRP7 and AGO2 in the apoplast, we  
550 performed RNA immunoprecipitation on whole cell lysate and P100 fractions. RNAs were  
551 separated by size using polyacrylamide gels, followed by staining with SYBR® Gold to  
552 detect nucleic acids. These analyses indicated that Arabidopsis GRP7-GFP, expressed  
553 under the native GRP7 promoter, binds to various size RNAs ranging from 50 nt to more  
554 than 500 nt in both whole cell lysate and in the P100 fraction (Figure 8C). Similarly,  
555 immunoprecipitation of Arabidopsis HA-AGO2 expressed under its native promoter  
556 revealed that Arabidopsis AGO2 binds to lncRNAs in both cell lysate and extracellular  
557 spaces of plant cells (Figure 8C). In mammalian systems, it has been reported that AGO  
558 proteins can bind to lncRNAs through AGO/miRNA complexes (Tarallo et al., 2017).  
559 Recently, mammalian AGO proteins have been shown to bind to circRNAs and may  
560 function in loading circRNAs into the extracellular matrix (Hansen et al., 2011; Chen et  
561 al., 2019; Xu et al., 2020a). The interaction between circRNAs and AGO might be  
562 mediated by miRNAs or through interaction with another RNA-binding protein that binds  
563 to circRNAs (Hansen et al., 2011; Chen et al., 2019; Zang et al., 2020).

564 Notably, the RNA banding pattern from AGO2-RNA-IP and GRP7-RNA-IP appears  
565 to be similar in polyacrylamide gels (Figure 8C), suggesting that GRP7 and AGO2 may  
566 be part of the same RNA-protein complex. We thus performed a co-immunoprecipitation  
567 analysis from whole leaf extracts and observed a strong interaction between AGO2 and  
568 GRP7 (Figure 8D). Whether the interaction between AGO2 and GRP7 is direct or through  
569 binding to the same RNAs is not yet known. Notably, we could not detect an interaction  
570 between GRP7 and AGO1, indicating that the GRP7-AGO interaction is specific to AGO2  
571 (Figure 8D).

572

## 573 **Mutation of AGO2 or GRP7 Alters Apoplastic circRNA Content**

574 To investigate whether AGO2 and/or GRP7 exert a specific effect on circRNA  
575 secretion or stability in the apoplast, we performed RNA-seq analyses on exRNAs from  
576 *grp7* and *ago2* mutants following RNase R treatment. These analyses revealed a marked  
577 reduction in total circRNAs identified in each mutant (Figure 6B), suggesting that these  
578 proteins contribute to circRNA secretion or stabilization.

579

## 580 **DISCUSSION**

581         Prior to the work presented above, it had been unclear whether siRNAs and  
582 miRNAs found in the apoplast of plant leaves are primarily packaged inside EVs or are  
583 exported via an alternative pathway. In our previous work, we had shown that removal of  
584 EVs from apoplastic wash fluid does not deplete the fluid of most siRNAs, suggesting that  
585 most siRNAs are located outside EVs (Baldrich et al., 2019). However, (Cai et al., 2018a)  
586 reported that siRNAs co-pellet with plant EVs and are resistant to degradation by  
587 micrococcal nuclease. Based on these observations, it was concluded that these siRNAs  
588 were packaged inside EVs. To address these seemingly contradictory results, we treated  
589 EV pellets with protease plus RNase A, which is expected to eliminate sRNAs located  
590 outside EVs, but not those located inside EVs. The majority of small RNAs in the size  
591 classes of 21, 22 and 24 nt were eliminated (Figure 1A), which indicates that most siRNAs  
592 and miRNAs are not located inside EVs but are located outside EVs and are protected  
593 from nucleases by RNA-binding proteins. This finding is consistent with recent work in  
594 mammalian systems, which has shown that many sRNAs that co-purify with EVs can be  
595 digested with protease plus RNase treatment (Shurtleff et al., 2017; Jeppesen et al.,  
596 2019) and are thus likely located outside EVs. This finding also suggests that EVs may  
597 not play a direct role in translocating sRNAs into other organisms such as fungal  
598 pathogens. Instead, it appears that sRNA-protein complexes located outside EVs could  
599 be the primary mediators of interkingdom RNA silencing.

600         Although our data indicate that the majority of sRNAs are located outside EVs, it  
601 is important to note that many sRNAs co-pellet with EVs during differential  
602 ultracentrifugation. This could be because the sRNAs are bound to protein complexes of  
603 a size similar to that of EVs and/or they could be associated with the surface of EVs. EVs  
604 have a relatively high surface area in comparison to their volume, which can promote  
605 interactions between EVs and other extracellular molecules (Janas et al., 2015; Buzás et  
606 al., 2018). A tight association between sRNAs and EV surface proteins could potentially  
607 protect sRNAs from degradation by nucleases.

608         In addition to sRNAs, our analyses of apoplastic RNAs revealed that plants secrete  
609 lncRNAs into the extracellular space. Although it has been reported that some

610 extracellular lncRNAs are located inside mammalian EVs (Takahashi et al., 2014; Chen  
611 et al., 2016; Zheng et al., 2018; Dai et al., 2020) our data indicate that extracellular  
612 lncRNAs produced by plants are located outside EVs and are associated with RNA-  
613 binding proteins. As with sRNAs, we found it was necessary to treat apoplastic pellets  
614 with protease prior to RNase A to determine whether lncRNAs were inside or our outside  
615 EVs, as treatment with RNase A alone had very little effect (Figure 5A).

616 In mammalian systems, lncRNAs have been shown to regulate multiple biological  
617 processes, including gene transcription (Luo et al., 2016), translation (Hu et al., 2018; Jia  
618 et al., 2019) and epigenetic modifications (Neumann et al., 2018), as well as cell-to-cell  
619 communication (Wei and Wang, 2015; Cai et al., 2018b; Zhu et al., 2021). lncRNAs have  
620 also been shown to contribute to antiviral innate immune responses in mammalian  
621 systems (Ouyang et al., 2016; Liu et al., 2020). Similarly, lncRNAs in plants have also  
622 been shown to modulate gene expression, epigenetic regulation and response to stresses  
623 (Di et al., 2014; Wang et al., 2018; Hamid et al., 2020; Moison et al., 2021). However, the  
624 presence of lncRNAs in the extracellular space of plant cells and their roles in cell-to-cell  
625 communication or immune responses have not been investigated yet. Whether plant  
626 extracellular lncRNAs can be taken up by pathogen cells is unknown, but the ability of  
627 fungi to take up long single-stranded and double-stranded RNAs in a petri dish suggests  
628 that this is likely (Qiao et al., 2021). If so, it will be interesting to assess whether these  
629 RNAs can impact gene expression in fungi and other plant-associated organisms.

630 A subclass of lncRNAs of particular interest is circRNAs, as these have previously  
631 been shown to be induced by pathogen infection in plants, and circRNAs appear to  
632 contribute to immunity (Fan et al., 2020). Our sequencing data revealed that Arabidopsis  
633 exRNA contains thousands of circRNAs. At the same time, no intact full-length mRNAs  
634 were identified, indicating that circRNAs are preferentially secreted or are more stable in  
635 the apoplast than linear mRNAs. This finding is similar to that reported for cultured human  
636 cells, in which circRNAs were found to co-purify with EVs and to be highly enriched  
637 relative to their matching linear RNAs found in cell lysates (Lasda and Parker, 2016).

638 Extracellular circRNAs in mammals have been suggested to contribute to cell-to-  
639 cell communication (Lasda and Parker, 2016). One likely function of mammalian  
640 extracellular circRNAs is as a sponge for sequestering miRNAs (Hansen et al., 2013).

641 Whether plant circRNAs play a similar role in the apoplast is not yet known, but it is  
642 tempting to speculate that they could function as target mimics for small RNAs secreted  
643 by pathogens. Pathogens have been reported to deliver sRNAs into plant cells to  
644 suppress immunity and enhance susceptibility (Weiberg et al., 2013; Wang et al., 2017;  
645 Dunker et al., 2020); thus, having a collection of sponges in the apoplast to soak up  
646 sRNAs secreted by pathogens before they can reach their targets inside the host cell  
647 could be quite useful.

648 The discovery that plants accumulate lncRNAs in their extracellular spaces raised  
649 the fundamental question of how this RNA is secreted. We found that the RNA-binding  
650 proteins AGO2 and GRP7 also accumulate in the apoplast and are bound to lncRNAs.  
651 Elimination of these proteins altered the RNA content of the apoplast, which indicates a  
652 possible function of AGO2 and GRP7 in the secretion of RNA into the apoplast or  
653 stabilizing RNAs once there. Notably, GRP7 belongs to the same family of RNA-binding  
654 proteins as human HNRNPA2B1, which has been shown to mediate sorting of specific  
655 miRNAs into EVs (Villarroya-Beltri et al., 2013), and to bind to m<sup>6</sup>A-modified RNA (Alarcón  
656 et al., 2015), which suggests that GRP7 could be fulfilling similar roles in plants.  
657 Consistent with this hypothesis, we found that plant exRNAs are highly enriched in m<sup>6</sup>A  
658 modifications. Whether m<sup>6</sup>A modification plays a role in the secretion of exRNAs into the  
659 apoplast or contributes to their stability requires further investigation.

660

## 661 **METHODS**

662

### 663 **Plant Materials and Growth Conditions**

664 The *Arabidopsis thaliana* *grp7* mutant (SALK\_039556.21.25.x) was obtained from the  
665 Arabidopsis Biological Resource Center at Ohio State. The Arabidopsis *ago2-1* mutant  
666 was obtained from James Carrington at the Donald Danforth Plant Science Center. The  
667 Arabidopsis HA-AGO2 transgenic line was also obtained from Dr. Carrington. It  
668 expresses HA-AGO2 under the native *AGO2* promoter in an *ago2-1* mutant background  
669 (Montgomery et al., 2008). The GRP7-GFP transgenic line was obtained from Dr.  
670 Dorothee Staiger at Bielefeld University. This line expresses GRP7-GFP under control  
671 of the native *GRP7* promoter and the *GRP7* 5'UTR, intron and 3'UTR in a *grp7-1* mutant  
672 background (Köster et al., 2014). Seeds were germinated on 0.5X Murashige and Skoog

673 medium containing 1% agar. To induce synchronous germination, petri dishes containing  
674 the seeds were stored at 4°C for 2 days and then moved to short-day conditions  
675 illuminated using GE HI-LUMEN XL Starcoat 32 watt fluorescent bulbs (a 50:50 mixture  
676 of 3,500K and 5,000K spectrum bulbs; 9 hour days, 22°C, 150  $\mu\text{Em}^{-2}\text{s}^{-1}$ ). After 10 days,  
677 the seedlings were transferred to Pro-Mix FLX potting mix supplemented with Osmocote  
678 slow-release fertilizer (14-14-14). Seedlings were grown under a clear plastic dome for  
679 the first week following transfer.

680

### 681 **Isolation of EVs and Other Apoplastic Particles**

682 Apoplastic wash fluid was isolated from 6-week-old Arabidopsis plants as described in  
683 Rutter and Innes (2017). Briefly, Arabidopsis rosettes were vacuum-infiltrated with vesicle  
684 isolation buffer (VIB), pH 6.0, containing 20 mM 2-(N-morpholino) ethanesulfonic acid  
685 (MES), 2 mM  $\text{CaCl}_2$ , and 0.01 M NaCl as described previously (Rutter et al., 2017). After  
686 vacuum-infiltration, the excess buffer was removed from leaf surfaces by blotting rosettes  
687 with Kimwipes®. To recover apoplastic fluid from infiltrated leaves, rosettes were placed  
688 inside needleless, 30-mL syringes (two rosettes per syringe). Syringes were placed inside  
689 50-mL tubes and centrifuged for 20 min at 700g with slow acceleration (4°C, JA-14 rotor,  
690 Avanti J-20 XP Centrifuge; Beckman Coulter). The apoplastic wash fluid was then filtered  
691 through a 0.22  $\mu\text{m}$  membrane and centrifuged at 10,000g for 30 minutes to remove any  
692 remaining large particles. The supernatant was transferred into new centrifuge tubes and  
693 centrifuged at 40,000g (P40) or 100,000g (P100) for one hour (4°C, TLA100.3, Optima  
694 TLX Ultracentrifuge; Beckman Coulter) to pellet EVs and other particles as noted in figure  
695 legends. The pellet was washed and re-pelleted at 40,000g or 100,000g at 4°C using a  
696 TLA100.3 rotor, Optima TLX Ultracentrifuge (Beckman Coulter). The pellets were re-  
697 suspended in 100  $\mu\text{L}$  of cold and filtered VIB (0.22  $\mu\text{m}$ ) and either used immediately, or  
698 stored at -80°C until further use.

699

### 700 **RNA Purification**

701

702 Total leaf RNA was isolated from 100 mg of fresh or frozen leaf tissue using TRIzol  
703 Reagent (Thermo Fisher Scientific). Briefly, to isolate RNA, leaf tissue was frozen in liquid  
704 nitrogen and ground into powder using a mortar and pestle. One mL of TRIzol Reagent

705 (Thermo Fischer Scientific, Waltham, MA) was added to the ground leaf tissue and mixed  
706 vigorously by vortexing. The leaf and TRIzol mixture was then shaken at room  
707 temperature for 10 minutes, followed by the addition of 200  $\mu$ L of chloroform. This mixture  
708 was then vortexed for 30 seconds and then centrifuged at 12,000g for 15 minutes. The  
709 aqueous phase was removed and mixed with one volume of cold isopropanol to  
710 precipitate the RNA. RNA pellets were washed using 80% cold ethanol. To isolate RNA  
711 from P40 and P100 pellets, 1 mL of TRIzol was added to 100  $\mu$ L of resuspended pellet,  
712 followed by the same procedure as used for leaf RNA isolation. RNA pellets were re-  
713 suspended in 10 to 12  $\mu$ L of ultrapure DNase/RNase-free water (Invitrogen) and stored  
714 at  $-80^{\circ}\text{C}$ . RNA quality and quantity was assessed using either a ThermoFisher NanoDrop  
715 One spectrophotometer, or an Agilent 2200 Tape Station.

716

### 717 **Trypsin and RNase A Treatments**

718 To assess whether RNAs were located inside or outside EVs, we performed RNase  
719 protection assays as follows. P40 pellets were treated with 1  $\mu$ g/mL trypsin (Promega) in  
720 the presence or absence of 1% (v/v) Triton X-100 (EMD-Millipore) in 15 mM Tris-HCl (80  
721  $\mu$ L final volume). Samples were incubated at  $37^{\circ}\text{C}$  for one hour followed by adding 1.5  
722  $\mu$ g/mL trypsin inhibitor (Worthington Biochemical. Corp) to inactivate trypsin. For the  
723 samples with RNase treatment, RNase A (Qiagen; diluted in 15 mM NaCl, 10 mM Tris-  
724 HCl pH 7.5) was added to the mixture to a final concentration of 5  $\mu$ g/mL (100  $\mu$ L final  
725 volume) and the sample was incubated at room temperature for 30 minutes. Immediately  
726 after RNase A treatment, RNA was isolated using 1 mL of TRIzol as described above. To  
727 inhibit RNase A activity, a mixture of 10  $\mu$ g/mL RNase Inhibitor, Murine (APEX-BIO) and  
728 40 unit/mL of RNase Out (Invitrogen) was added to the RNAs and stored at  $-80^{\circ}\text{C}$  until  
729 library preparation.

730

### 731 **RNA-Immunoprecipitation (RNA-IP)**

732 To isolate RNAs associated with GRP7-GFP and AGO2-HA from whole leaves and from  
733 apoplastic fluid of transgenic Arabidopsis plants we performed RNA-IP. For leaves, we  
734 used one gram of fresh or frozen leaf tissue, which was frozen under liquid nitrogen and  
735 ground with a mortar and pestle. Leaf powder was mixed with 5 mL of cold IP buffer (0.05

736 M Tris-Hcl, pH 7.4, 0.1 M KCl, 2.5 mM MgCl<sub>2</sub>, 0.1 % NP-40, 1% Triton X-100 and 50 U/mL  
737 RNase Out), incubated on ice for 10 minutes, and then transferred to a 15 mL  
738 polypropylene screw-cap centrifuge tube. The tube was then centrifuged for 10 minutes  
739 at 12,000g and the supernatant was filtered through a 0.45 µm membrane. The filtered  
740 supernatant was then incubated for one hour at 4°C with 50 µL of anti-GFP agarose  
741 beads (Chromotek) to pull down GRP7-GFP and with 50 µL of anti-HA agarose beads  
742 (ThermoFisher) to pull down AGO2-HA. Beads were then pelleted by centrifugation at  
743 1000g for 2 minutes at 4°C and washed at least 6 times with 5 mL of cold IP buffer for 5  
744 minutes at 4°C for each washing step. Finally, beads were washed two times with 1.5 mL  
745 of cold IP buffer followed by a final wash with 1 mL of ultrapure RNase-free/DNase-free  
746 water, and pelleted by centrifugation at 538g for 1 minute. To immunoprecipitate GRP7-  
747 GFP and AGO2-HA from apoplastic fluid, P100 pellets were re-suspended in 2 mL of cold  
748 IP buffer and proteins immunoprecipitated as described for whole leaf extracts.

749 To isolate RNA, beads were incubated with proteinase K at a final concentration  
750 of 1.5 µg/µL in 100 µL of PK buffer (0.1 M Tris-HCl, pH 7.4, 0.01 M EDTA, pH 8.0, 300  
751 mM NaCl and 2% SDS) for one hour at 55°C with intermittent shaking (every 3 minutes  
752 for 15 seconds). Beads were pelleted by centrifugation at 538g for 1 minute and RNA  
753 isolation was performed using TRIzol reagent as described above.

754

755

### 756 **Polyacrylamide Gel Preparation and Electrophoresis**

757

758 RNA samples were analyzed using denaturing polyacrylamide gel electrophoresis. Gels  
759 containing 15% polyacrylamide and 7 M urea were prepared using IBI InstaPAGE 40%  
760 acrylamide solution (37.5:1). RNA samples were denatured at 65°C in denaturing buffer  
761 (0.25 M EDTA (pH 8.0), 8 M Urea, 0.2 mg/mL bromophenol blue, 0.02 mg/mL xylene  
762 cyanol) and resolved on 0.5 x Tris-Boric Acid EDTA (0.5 x TBE; 0.065 mM Tris (pH 7.6),  
763 21 mM boric acid, 1.25 mM EDTA)-15% polyacrylamide urea gels. For size standards,  
764 we used New England Biolabs Low Range ssRNA Ladder (catalog number N0364S)  
765 and Takara 14-30 ssRNA Ladder Marker (catalog number 3416). SYBR® Gold Nucleic  
766 Acid Gel Stain (ThermoFisher) was used to stain gels for 30 minutes before UV



767 transillumination. Gel images were acquired using a Bio-Rad ChemiDoc-MP imaging  
768 system.

769

### 770 **RNA Dot Blots Using Anti-m<sup>6</sup>A Antibodies**

771 RNA was isolated from leaf or apoplastic P40 and P100 fractions using TRIzol as  
772 described above and the RNA concentration was measured using a ThermoFisher  
773 NanoDrop One spectrophotometer. For all samples, equal amounts of RNA were  
774 prepared in equal volumes (6  $\mu$ L) using UltraPure DNase/RNase-free distilled water  
775 (Invitrogen™). RNA samples were denatured at 95°C for 3 minutes and placed on ice  
776 immediately to prevent the formation of secondary structures. A piece of Hybond-N+  
777 membrane (Amersham Pharmacia Biotech) was prepared and RNA samples were  
778 applied directly to the Hybond-N+ membrane using a micropipettor. To prevent the spread  
779 of RNA on the membrane, 2  $\mu$ L of RNA solution was applied at a time, allowing the  
780 membrane to dry for three minutes before applying the next 2  $\mu$ L drop to the same spot,  
781 until a total of 6  $\mu$ L of RNA sample was applied. To crosslink the spotted RNAs to the  
782 membrane, an UVC-508 Ultraviolet Cross-linker (Ultra-Lum) was used to irradiate the  
783 membrane twice at 1200 microjoules [x100] for 30 seconds. The membrane was then  
784 washed in clean RNase-free 1x PBS buffer (1x PBS; 2.7 mM KCl, 8 mM Na<sub>2</sub>HPO<sub>4</sub>, 2 mM  
785 KH<sub>2</sub>PO<sub>4</sub> and 137 mM NaCl, pH 7.4) and blocked in 5% non-fat milk in 1x PBS containing  
786 0.02% Tween-20 for one hour at room temperature. The membrane was then incubated  
787 overnight with anti-m<sup>6</sup>A antibody (Abcam catalog number ab151230) at a 1:250 dilution  
788 in 5% non-fat milk in 1x PBS containing 0.02% Tween-20. The membrane was washed  
789 in 1x PBS containing 0.02% Tween-20 three times and incubated with horseradish  
790 peroxidase-labeled goat anti-rabbit antibody (Abcam catalog number ab205718) at a  
791 1:5000 dilution for 1 hour (Lisha et al., 2017). After final wash in 1x PBS contain 0.02%  
792 Tween-20, m<sup>6</sup>A modified RNAs were visualized using Immune-Star Reagent (Bio-Rad)  
793 and imaged using X-ray film.

794

### 795 **Preparation of Circular RNA Samples**

796 To investigate the presence of circRNAs, RNA was isolated from 100  $\mu$ L of P100 pellet  
797 using a PicoPure RNA isolation kit (ThermoFisher). The RNA (1-3  $\mu$ g) was then treated

798 with 5 units of RNase R (Lucigen. RNR07250) for one hour at 37°C. To visualize  
799 circRNAs, the RNA samples were resolved on TBE-15% polyacrylamide urea gels and  
800 stained with SYBR® Gold. To prepare RNA libraries for sequencing, it was necessary to  
801 remove RNase R from the RNA samples. This was accomplished by re-purifying the  
802 RNase R-treated RNA samples using a PicoPure RNA isolation column.

803

#### 804 **Preparation of sRNA-seq and RNA-seq Libraries**

805 sRNA libraries were constructed using the RealSeq-AC kit (no. 500-00048; RealSeq  
806 Biosciences) following the manufacturer's recommendations. To capture all types of  
807 small RNAs, we used 1 µg of RNA as starting material. Except for RNase-R treated  
808 samples, all RNA-seq libraries were generated using the NEBNext® Ultra™ II  
809 Directional RNA Library Prep Kit for Illumina® (catalog number E7765; New England  
810 Biolabs) using 500 ng of total RNA as starting material. rRNA removal was  
811 accomplished using the RiboMinus™ Plant Kit for RNA-Seq (catalog number  
812 A1083808, ThermoFisherScientific) and Poly(A) RNA purification was attempted using  
813 the NEBNext® Poly(A) magnetic isolation module (catalog number E7490, New  
814 England Biolabs). For sequencing of RNase R-treated samples, RNA-seq libraries were  
815 prepared using an Illumina TruSeq Stranded mRNA Library Prep kit (catalog number  
816 20020594; Illumina) following the manufacture's protocol, but skipping the poly(A)  
817 enrichment step. All libraries were sequenced on an Illumina NextSeq 550 instrument  
818 with paired-end 75-bp reads, except for the RNase R-treated samples, which were  
819 sequenced using paired-end 300-bp reads. Sequencing was performed at the Center  
820 for Genomics and Bioinformatics at Indiana University, Bloomington (IN, USA).

821

#### 822 **Data Analysis**

823 sRNA sequencing libraries were trimmed of adaptors using the software Cutadapt v1.16  
824 (Martin, 2011) with a minimum insert size of 10 nt and a maximum of 34 nt. Sequence  
825 quality was assessed using FastQC  
826 (<http://www.bioinformatics.babraham.ac.uk/projects/fastqc/>). Clean reads were aligned  
827 to the Arabidopsis genome (TAIR version 10), and all subsequent analyses were  
828 performed using the software Bowtie2 (Langmead and Salzberg, 2012). For miRNA

829 analyses, the latest version of miRBase (v22; (Kozomara and Griffiths-Jones, 2014)  
830 was used. RNA-seq libraries were also trimmed of adaptors using Cutadapt v1.16  
831 (Martin, 2011) and sequence quality assessed using FastQC. Clean reads were aligned  
832 to the Arabidopsis genome (TAIR version 10), using HISAT2 version 2.2.1 (Kim et al.,  
833 2019). To identify circRNAs, mapping was performed using the Arabidopsis data on  
834 PlantcircBase v5.0 (<http://ibi.zju.edu.cn/plantcircbase/>) (Chu et al., 2017). We only  
835 considered reads mapping concordantly and exclusively to the junction part of the  
836 circular RNA. Differential accumulation analyses were performed using DEseq2 with  
837 default parameters, using not-normalized reads as input (Love et al., 2014). Graphical  
838 representations were generated using the software ggplot2 (Wickham, 2009) in the R  
839 statistical environment.

840

#### 841 **Accession Numbers**

842 The data discussed in this publication have been deposited in NCBI's Gene Expression  
843 Omnibus (Edgar et al., 2002) and are accessible through GEO Series accession  
844 numbers GSE183867  
845 (<https://www.ncbi.nlm.nih.gov/geo/query/acc.cgi?acc=GSE183867>) and GSE185133  
846 (<https://www.ncbi.nlm.nih.gov/geo/query/acc.cgi?acc=GSE185133>). The accession  
847 numbers for Arabidopsis proteins discussed in this work are AT1G48410 (AGO1),  
848 AT1G31280 (AGO2), AT2G21660 (GRP7), AT1G72150 (PATL1), AT3G11820 (PEN1),  
849 AT1G59870 (PEN3), and AT3G25070 (RIN4).

850

#### 851 **Supplemental Data**

852

853 **Supplemental Figure 1.** Apoplastic miRNAs and trans-acting siRNAs are mostly  
854 located outside EVs and are protected by proteins.

855

856 **Supplemental Figure 2.** Apoplastic RNA appears to lack poly-adenylated RNA.

857

858

859

#### 860 **ACKNOWLEDGMENTS**

861

862 We thank Dorothee Staiger at the University of Bielefeld for providing seed of *GRP7-GFP*  
863 transgenic Arabidopsis and Jim Carrington for providing seed of *ago2-1* mutant and HA-

864 AGO2 transgenic Arabidopsis. We also thank the Arabidopsis Biological Resource Center  
865 at Ohio State for providing seed of an Arabidopsis *grp7* mutant, and the Indiana University  
866 Physical Biochemistry Instrumentation Facility for access to ultracentrifuges and  
867 nanoparticle tracking equipment. We also thank the IU Center for Genomics and  
868 Bioinformatics for assistance with the generation and analysis of sRNA-seq and RNA-seq  
869 data. This work was supported by three grants from the United States National Science  
870 Foundation, IOS-1645745 and IOS-1842685 to RWI and IOS-1842698 to BCM.

871

872

### 873 **AUTHOR CONTRIBUTIONS**

874 H.Z.K., P.B., B.D.R., R.W.I. and B.C.M. designed the research; H.Z.K., P.B., B.D.R.,  
875 K.Z. and L.B. performed the research; P.B. analyzed the sRNA-seq and RNA-seq data;  
876 H.Z.K., P.B., and R.W.I. wrote the article; all authors read and commented on the  
877 article.

878

879

### 880 **REFERENCES**

- 881 Alarcón, CR, Goodarzi, H, Lee, H, Liu, X, Tavazoie, S, and Tavazoie, SF. (2015).  
882 HNRNPA2B1 is a mediator of m<sup>6</sup>A-dependent nuclear RNA processing events.  
883 Cell 162, 1299-1308.
- 884 Baldrich, P, Rutter, BD, Karimi, HZ, Podicheti, R, Meyers, BC, and Innes, RW. (2019).  
885 Plant extracellular vesicles contain diverse small RNA species and are enriched  
886 in 10- to 17-nucleotide "Tiny" RNAs. Plant Cell 31, 315-324.
- 887 Blevins, T, Podicheti, R, Mishra, V, Marasco, M, Wang, J, Rusch, D, Tang, H, and  
888 Pikaard, CS. (2015). Identification of Pol IV and RDR2-dependent precursors of  
889 24 nt siRNAs guiding de novo DNA methylation in Arabidopsis. Elife 4, e09591.
- 890 Bose, R, and Ain, R. (2018). Regulation of transcription by circular RNAs. Adv Exp Med  
891 Biol 1087, 81-94.
- 892 Buzás, EI, Tóth, E, Sódar, BW, and Szabó-Taylor, K. (2018). Molecular interactions at  
893 the surface of extracellular vesicles. Semin Immunopathol 40, 453-464.

- 894 Cai, Q, Qiao, L, Wang, M, He, B, Lin, FM, Palmquist, J, Huang, SD, and Jin, H. (2018a).  
895 Plants send small RNAs in extracellular vesicles to fungal pathogen to silence  
896 virulence genes. *Science* 360, 1126-1129.
- 897 Cai, Y, Dong, ZY, and Wang, JY. (2018b). LncRNA NNT-AS1 is a major mediator of  
898 cisplatin chemoresistance in non-small cell lung cancer through MAPK/Slug  
899 pathway. *Eur Rev Med Pharmacol Sci* 22, 4879-4887.
- 900 Chen, B, and Huang, S. (2018). Circular RNA: an emerging non-coding RNA as a  
901 regulator and biomarker in cancer. *Cancer Lett* 418, 41-50.
- 902 Chen, M, Xu, R, Ji, H, Greening, DW, Rai, A, Izumikawa, K, Ishikawa, H, Takahashi, N,  
903 and Simpson, RJ. (2016). Transcriptome and long noncoding RNA sequencing of  
904 three extracellular vesicle subtypes released from the human colon cancer  
905 LIM1863 cell line. *Sci Rep* 6, 38397.
- 906 Chen, Y, Yang, F, Fang, E, Xiao, W, Mei, H, Li, H, Li, D, Song, H, Wang, J, Hong, M,  
907 Wang, X, Huang, K, Zheng, L, and Tong, Q. (2019). Circular RNA circAGO2  
908 drives cancer progression through facilitating HuR-repressed functions of AGO2-  
909 miRNA complexes. *Cell Death Differ* 26, 1346-1364.
- 910 Chu, Q, Zhang, X, Zhu, X, Liu, C, Mao, L, Ye, C, Zhu, QH, and Fan, L. (2017).  
911 PlantcircBase: a database for plant circular RNAs. *Mol Plant* 10, 1126-1128.
- 912 Dai, W, Jin, X, Han, L, Huang, H, Ji, Z, Xu, X, Tang, M, Jiang, B, and Chen, W. (2020).  
913 Exosomal lncRNA DOCK9-AS2 derived from cancer stem cell-like cells activated  
914 Wnt/ $\beta$ -catenin pathway to aggravate stemness, proliferation, migration, and  
915 invasion in papillary thyroid carcinoma. *Cell Death Dis* 11, 743.
- 916 Di, C, Yuan, J, Wu, Y, Li, J, Lin, H, Hu, L, Zhang, T, Qi, Y, Gerstein, MB, Guo, Y, and  
917 Lu, ZJ. (2014). Characterization of stress-responsive lncRNAs in *Arabidopsis*  
918 *thaliana* by integrating expression, epigenetic and structural features. *Plant J* 80,  
919 848-861.
- 920 Di Timoteo, G, Dattilo, D, Centrón-Broco, A, Colantoni, A, Guarnacci, M, Rossi, F,  
921 Incarnato, D, Oliviero, S, Fatica, A, Morlando, M, and Bozzoni, I. (2020).  
922 Modulation of circRNA metabolism by m<sup>6</sup>A modification. *Cell Rep* 31, 107641.

- 923 Dunker, F, Trutzenberg, A, Rothenpieler, JS, Kuhn, S, Pröls, R, Schreiber, T, Tissier, A,  
924       Kemen, A, Kemen, E, Hückelhoven, R, and Weiberg, A. (2020). Oomycete small  
925       RNAs bind to the plant RNA-induced silencing complex for virulence. *Elife* 9.
- 926 Fan, J, Quan, W, Li, GB, Hu, XH, Wang, Q, Wang, H, Li, XP, Luo, X, Feng, Q, Hu, ZJ,  
927       Feng, H, Pu, M, Zhao, JQ, Huang, YY, Li, Y, Zhang, Y, and Wang, WM. (2020).  
928       circRNAs are Involved in the rice-*Magnaporthe oryzae* interaction. *Plant Physiol*  
929       182, 272-286.
- 930 Fu, XD, and Ares, M, Jr. (2014). Context-dependent control of alternative splicing by  
931       RNA-binding proteins. *Nat Rev Genet* 15, 689-701.
- 932 Guerra-Guimarães, L, Pinheiro, C, Chaves, I, Barros, DR, and Ricardo, CP. (2016).  
933       Protein dynamics in the plant extracellular space. *Proteomes* 4.
- 934 Hamid, R, Jacob, F, Marashi, H, Rathod, V, and Tomar, RS. (2020). Uncloaking  
935       lncRNA-mediated gene expression as a potential regulator of CMS in cotton  
936       (*Gossypium hirsutum* L.). *Genomics* 112, 3354-3364.
- 937 Hansen, TB, Wiklund, ED, Bramsen, JB, Villadsen, SB, Statham, AL, Clark, SJ, and  
938       Kjems, J. (2011). miRNA-dependent gene silencing involving Ago2-mediated  
939       cleavage of a circular antisense RNA. *Embo j* 30, 4414-4422.
- 940 Hansen, TB, Jensen, TI, Clausen, BH, Bramsen, JB, Finsen, B, Damgaard, CK, and  
941       Kjems, J. (2013). Natural RNA circles function as efficient microRNA sponges.  
942       *Nature* 495, 384-388.
- 943 Harvey, JJ, Lewsey, MG, Patel, K, Westwood, J, Heimstädt, S, Carr, JP, and  
944       Baulcombe, DC. (2011). An antiviral defense role of AGO2 in plants. *PLoS One*  
945       6, e14639.
- 946 He, B, Cai, Q, Qiao, L, Huang, CY, Wang, S, Miao, W, Ha, T, Wang, Y, and Jin, H.  
947       (2021). RNA-binding proteins contribute to small RNA loading in plant  
948       extracellular vesicles. *Nat Plants* 7, 342-352.
- 949 Hou, Y, Zhai, Y, Feng, L, Karimi, HZ, Rutter, BD, Zeng, L, Choi, DS, Zhang, B, Gu, W,  
950       Chen, X, Ye, W, Innes, RW, Zhai, J, and Ma, W. (2019). A *Phytophthora* effector  
951       suppresses trans-kingdom RNAi to promote disease susceptibility. *Cell Host*  
952       *Microbe* 25, 153-165.e155.

- 953 Hu, K, Li, L, Liao, Y, and Liang, M. (2018). LncRNA Gm2044 highly expresses in  
954 spermatocyte and inhibits Utf1 translation by interacting with Utf1 mRNA. *Genes*  
955 *Genomics* 40, 781-787.
- 956 Hu, W, Han, Q, Zhao, L, and Wang, L. (2019). Circular RNA circRNA\_15698  
957 aggravates the extracellular matrix of diabetic nephropathy mesangial cells via  
958 miR-185/TGF- $\beta$ 1. *J Cell Physiol* 234, 1469-1476.
- 959 Huang, CY, Wang, H, Hu, P, Hamby, R, and Jin, H. (2019). Small RNAs - big players in  
960 plant-microbe interactions. *Cell Host Microbe* 26, 173-182.
- 961 Huber, RJ, and O'Day, DH. (2017). Extracellular matrix dynamics and functions in the  
962 social amoeba *Dictyostelium*: a critical review. *Biochim Biophys Acta Gen Subj*  
963 1861, 2971-2980.
- 964 Janas, T, Janas, MM, Sapoń, K, and Janas, T. (2015). Mechanisms of RNA loading into  
965 exosomes. *FEBS Lett* 589, 1391-1398.
- 966 Jeck, WR, and Sharpless, NE. (2014). Detecting and characterizing circular RNAs. *Nat*  
967 *Biotechnol* 32, 453-461.
- 968 Jeppesen, DK, Fenix, AM, Franklin, JL, Higginbotham, JN, Zhang, Q, Zimmerman, LJ,  
969 Liebler, DC, Ping, J, Liu, Q, Evans, R, Fissell, WH, Patton, JG, Rome, LH,  
970 Burnette, DT, and Coffey, RJ. (2019). Reassessment of exosome composition.  
971 *Cell* 177, 428-445 e418.
- 972 Jia, X, Shi, L, Wang, X, Luo, L, Ling, L, Yin, J, Song, Y, Zhang, Z, Qiu, N, Liu, H, Deng,  
973 M, He, Z, Li, H, and Zheng, G. (2019). KLF5 regulated lncRNA RP1 promotes the  
974 growth and metastasis of breast cancer via repressing p27kip1 translation. *Cell*  
975 *Death Dis* 10, 373.
- 976 Kim, D, Paggi, JM, Park, C, Bennett, C, and Salzberg, SL. (2019). Graph-based  
977 genome alignment and genotyping with HISAT2 and HISAT-genotype. *Nat*  
978 *Biotechnol* 37, 907-915.
- 979 Koch, A, and Wassenegger, M. (2021). Host-induced gene silencing - mechanisms and  
980 applications. *New Phytol* 231, 54-59.
- 981 Koch, A, Kumar, N, Weber, L, Keller, H, Imani, J, and Kogel, KH. (2013). Host-induced  
982 gene silencing of cytochrome P450 lanosterol C14 $\alpha$ -demethylase-encoding

- 983 genes confers strong resistance to *Fusarium* species. *Proc Natl Acad Sci U S A*  
984 110, 19324-19329.
- 985 Köster, T, Meyer, K, Weinholdt, C, Smith, LM, Lummer, M, Speth, C, Grosse, I, Weigel,  
986 D, and Staiger, D. (2014). Regulation of pri-miRNA processing by the hnRNP-like  
987 protein AtGRP7 in *Arabidopsis*. *Nucleic Acids Res* 42, 9925-9936.
- 988 Kozomara, A, and Griffiths-Jones, S. (2014). miRBase: annotating high confidence  
989 microRNAs using deep sequencing data. *Nucleic Acids Res* 42, D68-73.
- 990 Langmead, B, and Salzberg, SL. (2012). Fast gapped-read alignment with Bowtie 2. *Nat*  
991 *Methods* 9, 357-359.
- 992 Lasda, E, and Parker, R. (2016). Circular RNAs co-precipitate with extracellular  
993 vesicles: a possible mechanism for circRNA clearance. *PLoS One* 11, e0148407.
- 994 Li, Y, Zheng, Q, Bao, C, Li, S, Guo, W, Zhao, J, Chen, D, Gu, J, He, X, and Huang, S.  
995 (2015). Circular RNA is enriched and stable in exosomes: a promising biomarker  
996 for cancer diagnosis. *Cell Res* 25, 981-984.
- 997 Liu, W, Wang, Z, Liu, L, Yang, Z, Liu, S, Ma, Z, Liu, Y, Ma, Y, Zhang, L, Zhang, X,  
998 Jiang, M, and Cao, X. (2020). LncRNA Malat1 inhibition of TDP43 cleavage  
999 suppresses IRF3-initiated antiviral innate immunity. *Proc Natl Acad Sci U S A*  
1000 117, 23695-23706.
- 1001 Love, MI, Huber, W, and Anders, S. (2014). Moderated estimation of fold change and  
1002 dispersion for RNA-seq data with DESeq2. *Genome Biol* 15, 550.
- 1003 Luo, S, Lu, JY, Liu, L, Yin, Y, Chen, C, Han, X, Wu, B, Xu, R, Liu, W, Yan, P, Shao, W,  
1004 Lu, Z, Li, H, Na, J, Tang, F, Wang, J, Zhang, YE, and Shen, X. (2016). Divergent  
1005 lncRNAs regulate gene expression and lineage differentiation in pluripotent cells.  
1006 *Cell Stem Cell* 18, 637-652.
- 1007 Mahmoudi, E, Kiltchewskij, D, Fitzsimmons, C, and Cairns, MJ. (2019). Depolarization-  
1008 associated circRNA regulate neural gene expression and in some cases may  
1009 function as templates for translation. *Cells* 9.
- 1010 Mamta, Reddy, KR, and Rajam, MV. (2016). Targeting chitinase gene of *Helicoverpa*  
1011 *armigera* by host-induced RNA interference confers insect resistance in tobacco  
1012 and tomato. *Plant Mol Biol* 90, 281-292.



- 1013 Martin, M. (2011). Cutadapt removes adapter sequences from high-throughput  
1014 sequencing reads. 2011 17, 3.
- 1015 Montgomery, TA, Howell, MD, Cuperus, JT, Li, D, Hansen, JE, Alexander, AL, Chapman, EJ,  
1016 Fahlgren, N, Allen, E, and Carrington, JC. (2008). Specificity of ARGONAUTE7-miR390  
1017 interaction and dual functionality in TAS3 trans-acting siRNA formation. Cell 133, 128-  
1018 141.
- 1019 Moison, M, Pacheco, JM, Lucero, L, Fonouni-Farde, C, Rodríguez-Melo, J, Mansilla, N,  
1020 Christ, A, Bazin, J, Benhamed, M, Ibañez, F, Crespi, M, Estevez, JM, and Ariel,  
1021 F. (2021). The lncRNA APOLO interacts with the transcription factor WRKY42 to  
1022 trigger root hair cell expansion in response to cold. Mol Plant 14, 937-948.
- 1023 Narula, K, Elagamey, E, Abdellatef, MAE, Sinha, A, Ghosh, S, Chakraborty, N, and  
1024 Chakraborty, S. (2020). Chitosan-triggered immunity to Fusarium in chickpea is  
1025 associated with changes in the plant extracellular matrix architecture, stomatal  
1026 closure and remodeling of the plant metabolome and proteome. Plant J 103, 561-  
1027 583.
- 1028 Neumann, P, Jaé, N, Knau, A, Glaser, SF, Fouani, Y, Rossbach, O, Krüger, M, John, D,  
1029 Bindereif, A, Grote, P, Boon, RA, and Dimmeler, S. (2018). The lncRNA GATA6-  
1030 AS epigenetically regulates endothelial gene expression via interaction with  
1031 LOXL2. Nat Commun 9, 237.
- 1032 Nicaise, V, Joe, A, Jeong, BR, Korneli, C, Boutrot, F, Westedt, I, Staiger, D, Alfano, JR,  
1033 and Zipfel, C. (2013). Pseudomonas HopU1 modulates plant immune receptor  
1034 levels by blocking the interaction of their mRNAs with GRP7. Embo j 32, 701-  
1035 712.
- 1036 Niu, D, Wang, Z, Wang, S, Qiao, L, and Zhao, H. (2015). Profiling of small RNAs  
1037 involved in plant-pathogen interactions. Methods Mol Biol 1287, 61-79.
- 1038 Nowara, D, Gay, A, Lacomme, C, Shaw, J, Ridout, C, Douchkov, D, Hensel, G,  
1039 Kumlehn, J, and Schweizer, P. (2010). HIGS: host-induced gene silencing in the  
1040 obligate biotrophic fungal pathogen *Blumeria graminis*. Plant Cell 22, 3130-3141.
- 1041 Ouyang, J, Hu, J, and Chen, JL. (2016). lncRNAs regulate the innate immune response  
1042 to viral infection. Wiley Interdiscip Rev RNA 7, 129-143.

- 1043 Panda, AC. (2018). Circular RNAs act as miRNA sponges. *Adv Exp Med Biol* 1087, 67-  
1044 79.
- 1045 Preußner, C, Hung, LH, Schneider, T, Schreiner, S, Hardt, M, Moebus, A, Santoso, S,  
1046 and Bindereif, A. (2018). Selective release of circRNAs in platelet-derived  
1047 extracellular vesicles. *J Extracell Vesicles* 7, 1424473.
- 1048 Qi, T, Guo, J, Peng, H, Liu, P, Kang, Z, and Guo, J. (2019). Host-induced gene  
1049 silencing: a powerful strategy to control diseases of Wheat and Barley. *Int J Mol*  
1050 *Sci* 20.
- 1051 Qiao, L, Lan, C, Capriotti, L, Ah-Fong, A, Nino Sanchez, J, Hamby, R, Heller, J, Zhao,  
1052 H, Glass, NL, Judelson, HS, Mezzetti, B, Niu, D, and Jin, H. (2021). Spray-  
1053 induced gene silencing for disease control is dependent on the efficiency of  
1054 pathogen RNA uptake. *Plant Biotechnol J*.
- 1055 Rutter, BD, and Innes, RW. (2017). Extracellular vesicles isolated from the leaf apoplast  
1056 carry stress-response proteins. *Plant Physiol* 173, 728-741.
- 1057 Rutter, BD, and Innes, RW. (2020). Growing pains: addressing the pitfalls of plant  
1058 extracellular vesicle research. *New Phytol* 228, 1505-1510.
- 1059 Rutter, BD, Rutter, KL, and Innes, RW. (2017). Isolation and quantification of plant  
1060 extracellular vesicles. *Bio-Protocol* 7.
- 1061 Schaefer, LK, Parlange, F, Buchmann, G, Jung, E, Wehrli, A, Herren, G, Müller, MC,  
1062 Stehlin, J, Schmid, R, Wicker, T, Keller, B, and Bourras, S. (2020). Cross-  
1063 kingdom RNAi of pathogen effectors leads to quantitative adult plant resistance  
1064 in wheat. *Front Plant Sci* 11, 253.
- 1065 Schlemmer, T, Barth, P, Weipert, L, Preusser, C, Hardt, M, Mobus, A, Busche, T, and  
1066 Koch, A. (2021). Isolation and characterization of barley (*Hordeum vulgare*)  
1067 extracellular vesicles to assess their role in RNA spray-based crop protection. *Int*  
1068 *J Mol Sci* 22.
- 1069 Seimiya, T, Otsuka, M, Iwata, T, Shibata, C, Tanaka, E, Suzuki, T, and Koike, K. (2020).  
1070 Emerging roles of exosomal circular RNAs in cancer. *Front Cell Dev Biol* 8,  
1071 568366.

- 1072 Shurtleff, MJ, Yao, J, Qin, Y, Nottingham, RM, Temoche-Diaz, MM, Schekman, R, and  
1073 Lambowitz, AM. (2017). Broad role for YBX1 in defining the small noncoding  
1074 RNA composition of exosomes. *Proc Natl Acad Sci U S A* 114, E8987-e8995.
- 1075 Steudle, E. (1980). Water-relation parameters of individual mesophyll cells of the  
1076 crassulacean acid metabolism plant *Kalanchoë daigremontiana*. *Plant Physiol*  
1077 66, 1155-1163.
- 1078 Streitner, C, Köster, T, Simpson, CG, Shaw, P, Danisman, S, Brown, JW, and Staiger,  
1079 D. (2012). An hnRNP-like RNA-binding protein affects alternative splicing by in  
1080 vivo interaction with transcripts in *Arabidopsis thaliana*. *Nucleic Acids Res* 40,  
1081 11240-11255.
- 1082 Takahashi, K, Yan, IK, Kogure, T, Haga, H, and Patel, T. (2014). Extracellular vesicle-  
1083 mediated transfer of long non-coding RNA ROR modulates chemosensitivity in  
1084 human hepatocellular cancer. *FEBS Open Bio* 4, 458-467.
- 1085 Tarallo, R, Giurato, G, Bruno, G, Ravo, M, Rizzo, F, Salvati, A, Ricciardi, L, Marchese,  
1086 G, Cordella, A, Rocco, T, Gigantino, V, Pierri, B, Cimmino, G, Milanesi, L,  
1087 Ambrosino, C, Nyman, TA, Nassa, G, and Weisz, A. (2017). The nuclear  
1088 receptor ER $\beta$  engages AGO2 in regulation of gene transcription, RNA splicing  
1089 and RISC loading. *Genome Biol* 18, 189.
- 1090 Vincent, HA, and Deutscher, MP. (2006). Substrate recognition and catalysis by the  
1091 exoribonuclease RNase R. *J Biol Chem* 281, 29769-29775.
- 1092 Wang, M, and Dean, RA. (2020). Movement of small RNAs in and between plants and  
1093 fungi. *Mol Plant Pathol* 21, 589-601.
- 1094 Wang, M, Weiberg, A, Dellota, E, Jr., Yamane, D, and Jin, H. (2017). Botrytis small  
1095 RNA Bc-siR37 suppresses plant defense genes by cross-kingdom RNAi. *RNA*  
1096 biology 14, 421-428.
- 1097 Wang, M, Xie, F, Lin, J, Zhao, Y, Zhang, Q, Liao, Z, and Wei, P. (2021). Diagnostic and  
1098 prognostic value of circulating circRNAs in cancer. *Front Med (Lausanne)* 8,  
1099 649383.
- 1100 Wang, Y, Wang, Y, and Wang, Y. (2020). Apoplastic proteases: powerful weapons  
1101 against pathogen infection in plants. *Plant Commun* 1, 100085.

- 1102 Wang, Y, Luo, X, Sun, F, Hu, J, Zha, X, Su, W, and Yang, J. (2018). Overexpressing  
1103 lncRNA LAIR increases grain yield and regulates neighbouring gene cluster  
1104 expression in rice. *Nat Commun* 9, 3516.
- 1105 Wei, S, and Wang, K. (2015). Long noncoding RNAs: pivotal regulators in acute myeloid  
1106 leukemia. *Exp Hematol Oncol* 5, 30.
- 1107 Weiberg, A, Wang, M, Lin, FM, Zhao, H, Zhang, Z, Kaloshian, I, Huang, HD, and Jin, H.  
1108 (2013). Fungal small RNAs suppress plant immunity by hijacking host RNA  
1109 interference pathways. *Science* 342, 118-123.
- 1110 Wickham, H. (2009). *ggplot2: Elegant Graphics for Data Analysis*. (Springer, New  
1111 York.).
- 1112 Xu, J, Wan, Z, Tang, M, Lin, Z, Jiang, S, Ji, L, Gorshkov, K, Mao, Q, Xia, S, Cen, D,  
1113 Zheng, J, Liang, X, and Cai, X. (2020a). N<sup>6</sup>-methyladenosine-modified circRNA-  
1114 SORE sustains sorafenib resistance in hepatocellular carcinoma by regulating  $\beta$ -  
1115 catenin signaling. *Mol Cancer* 19, 163.
- 1116 Xu, Y, Kong, S, Qin, S, Shen, X, and Ju, S. (2020b). Exosomal circRNAs: sorting  
1117 mechanisms, roles and clinical applications in tumors. *Front Cell Dev Biol* 8,  
1118 581558.
- 1119 Zang, J, Lu, D, and Xu, A. (2020). The interaction of circRNAs and RNA binding  
1120 proteins: An important part of circRNA maintenance and function. *J Neurosci Res*  
1121 98, 87-97.
- 1122 Zhan, Y, Du, L, Wang, L, Jiang, X, Zhang, S, Li, J, Yan, K, Duan, W, Zhao, Y, Wang, L,  
1123 Wang, Y, and Wang, C. (2018). Expression signatures of exosomal long non-  
1124 coding RNAs in urine serve as novel non-invasive biomarkers for diagnosis and  
1125 recurrence prediction of bladder cancer. *Mol Cancer* 17, 142.
- 1126 Zhang, L, Hou, C, Chen, C, Guo, Y, Yuan, W, Yin, D, Liu, J, and Sun, Z. (2020a). The  
1127 role of N<sup>6</sup>-methyladenosine (m<sup>6</sup>A) modification in the regulation of circRNAs. *Mol*  
1128 *Cancer* 19, 105.
- 1129 Zhang, W, Zhang, C, Hu, C, Luo, C, Zhong, B, and Yu, X. (2020b). Circular RNA-  
1130 CDR1as acts as the sponge of microRNA-641 to promote osteoarthritis  
1131 progression. *J Inflamm (Lond)* 17, 8.

- 1132 Zheng, R, Du, M, Wang, X, Xu, W, Liang, J, Wang, W, Lv, Q, Qin, C, Chu, H, Wang, M,  
1133 Yuan, L, Qian, J, and Zhang, Z. (2018). Exosome-transmitted long non-coding  
1134 RNA PTENP1 suppresses bladder cancer progression. *Mol Cancer* 17, 143.
- 1135 Zhou, M, Palanca, AMS, and Law, JA. (2018). Locus-specific control of the de novo  
1136 DNA methylation pathway in Arabidopsis by the CLASSY family. *Nat Genet* 50,  
1137 865-873.
- 1138 Zhu, Z, Gong, X, Li, J, Shi, Y, and Zhang, M. (2021). Long non-coding RNA receptor  
1139 activator of nuclear factor- $\kappa$  B ligand promotes cisplatin resistance in non-small  
1140 cell lung cancer cells. *Exp Ther Med* 21, 518.
- 1141
- 1142
